# Supplementary material
Source: PubMed Central journal article supplement (PMC6241292)

## **Supporting Information**

### **An Analysis of the Complementary Stereoselective Alkylations of Imidazolidinone Derivatives Towards $\alpha$ -Quaternary Proline-Based Amino Amides**

Brian J. Knight, Erin E. Stache, and Eric M. Ferreira\*

Department of Chemistry, University of Georgia, Athens, GA 30602, United States

[emferr@uga.edu](mailto:emferr@uga.edu)

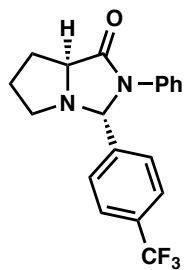

**exo-30**  
**<sup>1</sup>H NMR**  
**(400 MHz, CDCl<sub>3</sub>)**

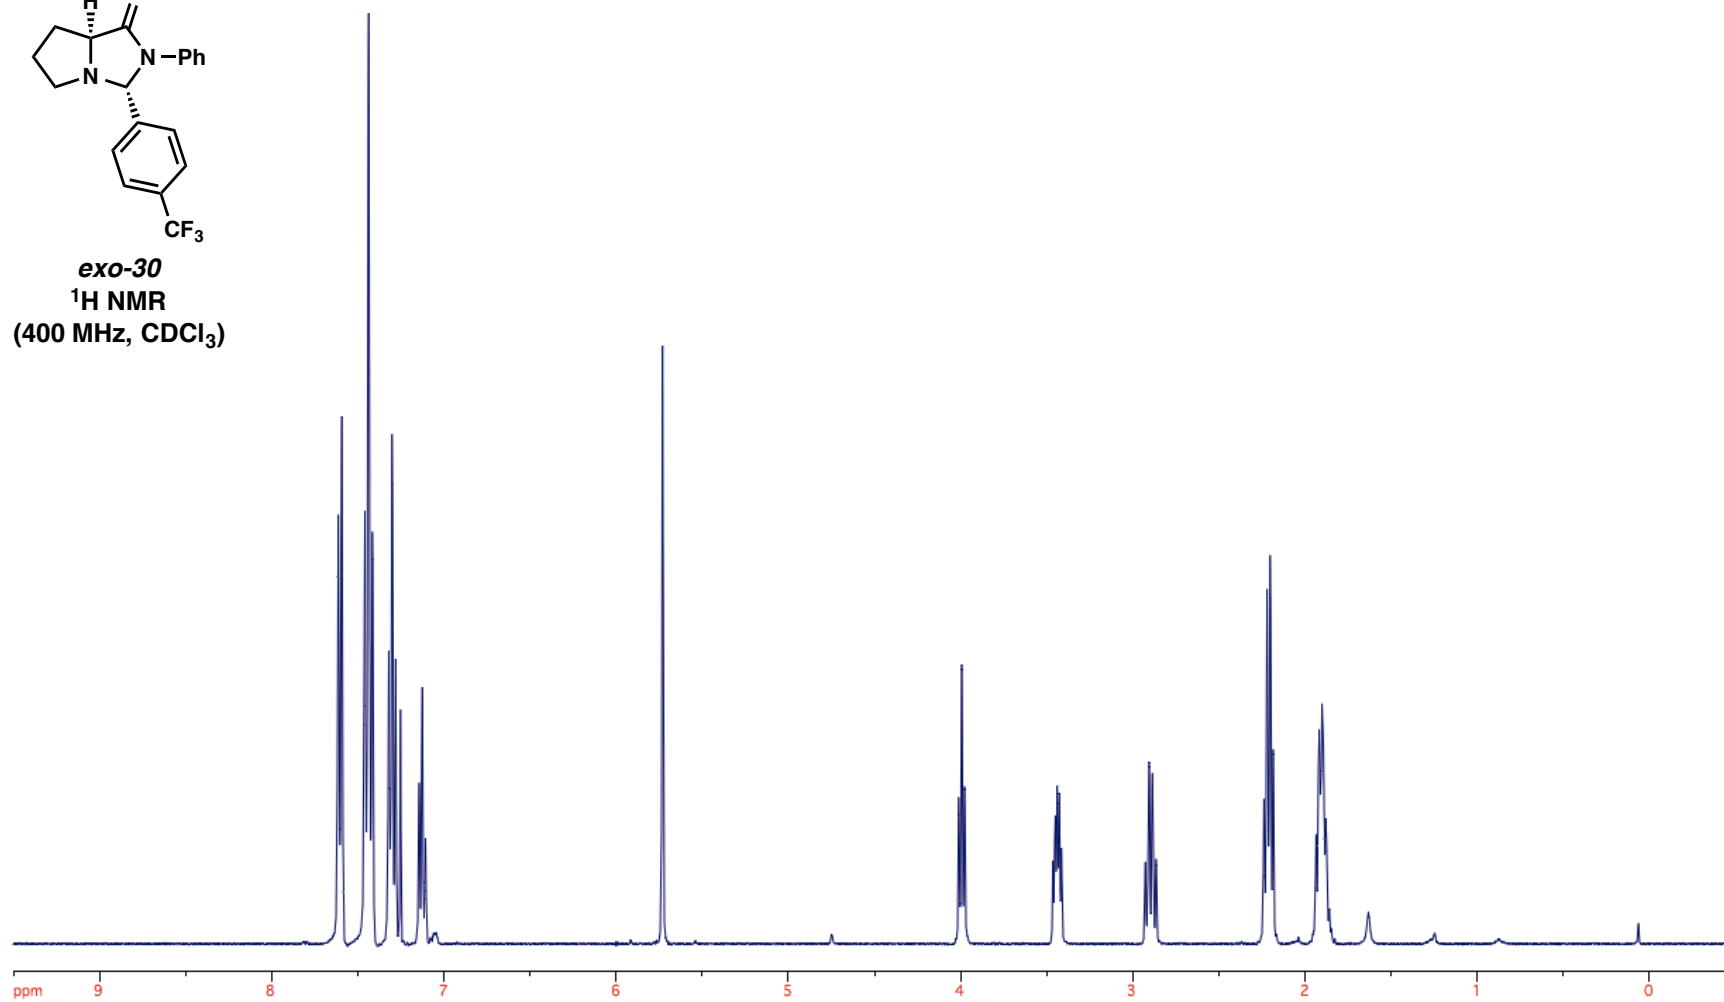

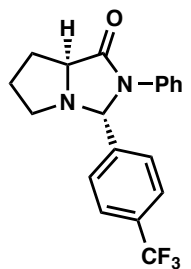

**exo-30**  
**<sup>13</sup>C NMR**  
**(100 MHz, CDCl<sub>3</sub>)**

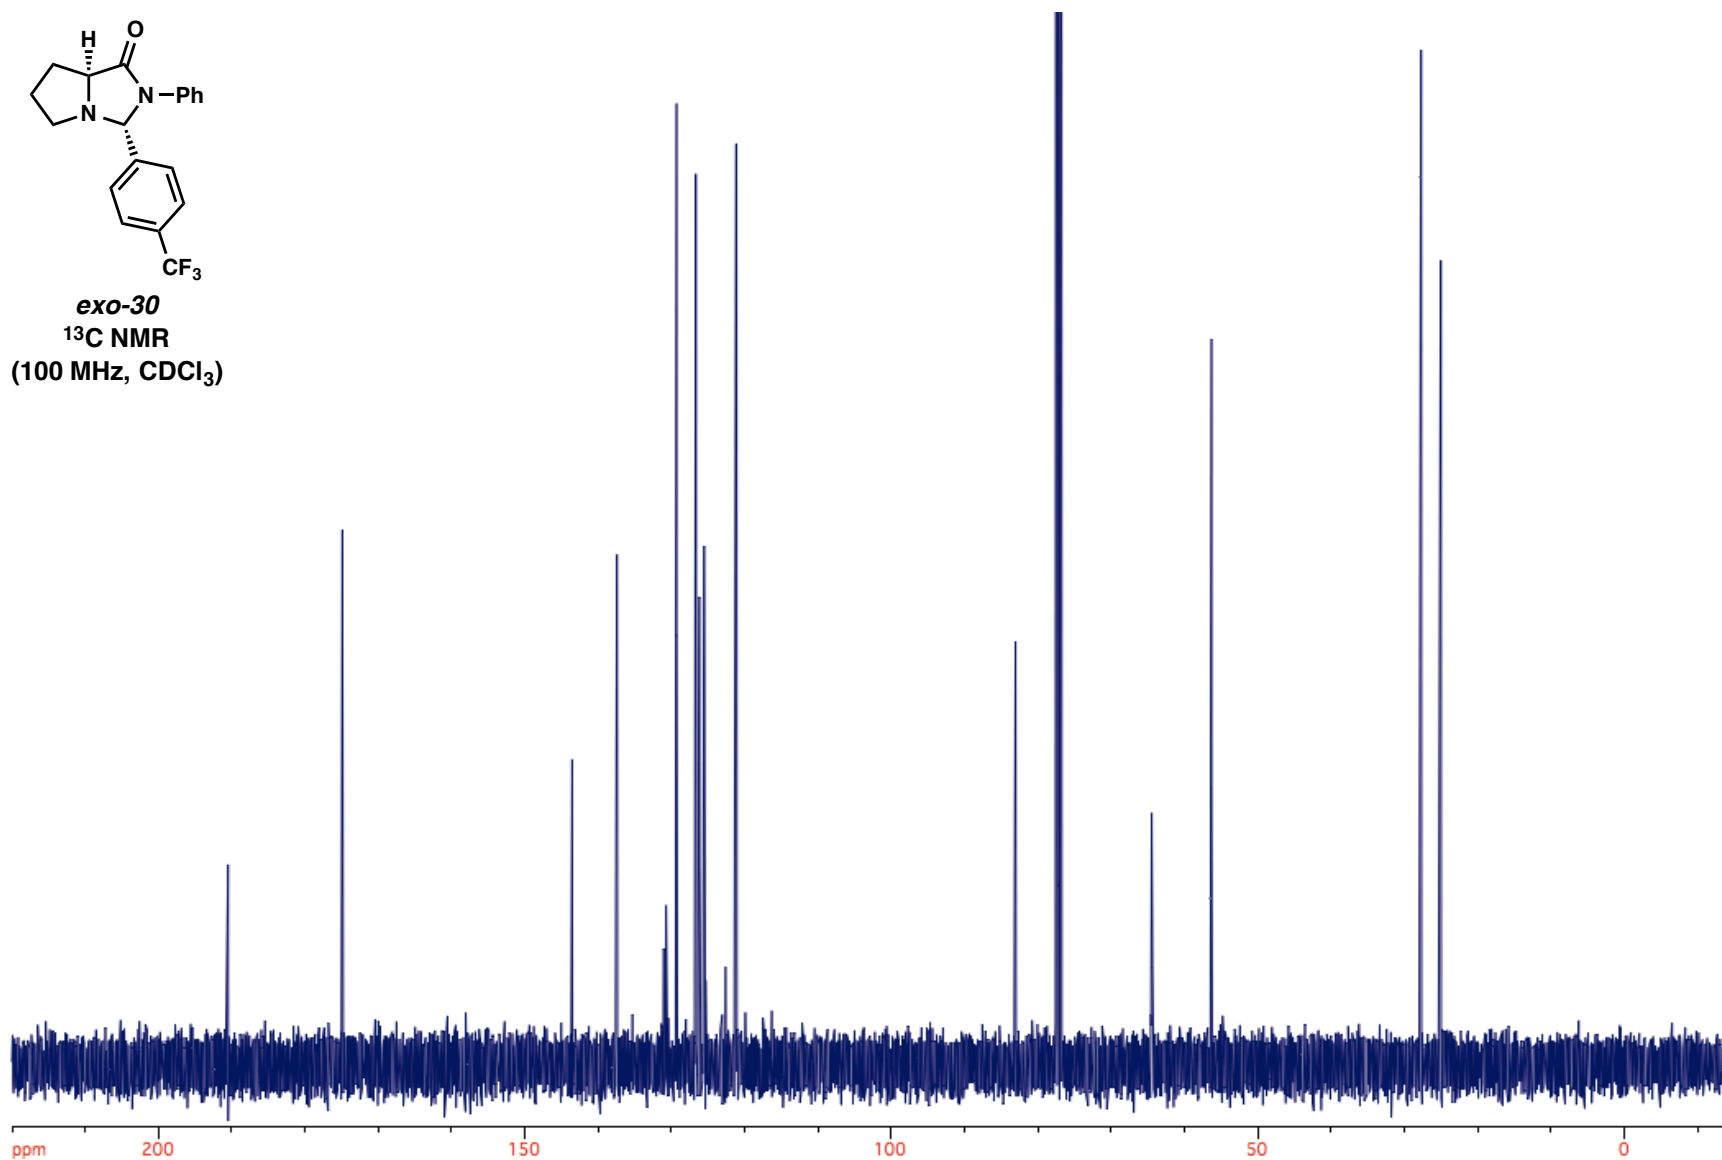

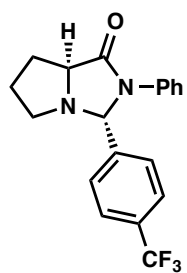

**exo-30**  
**<sup>19</sup>F NMR**  
**(377 MHz, CDCl<sub>3</sub>)**

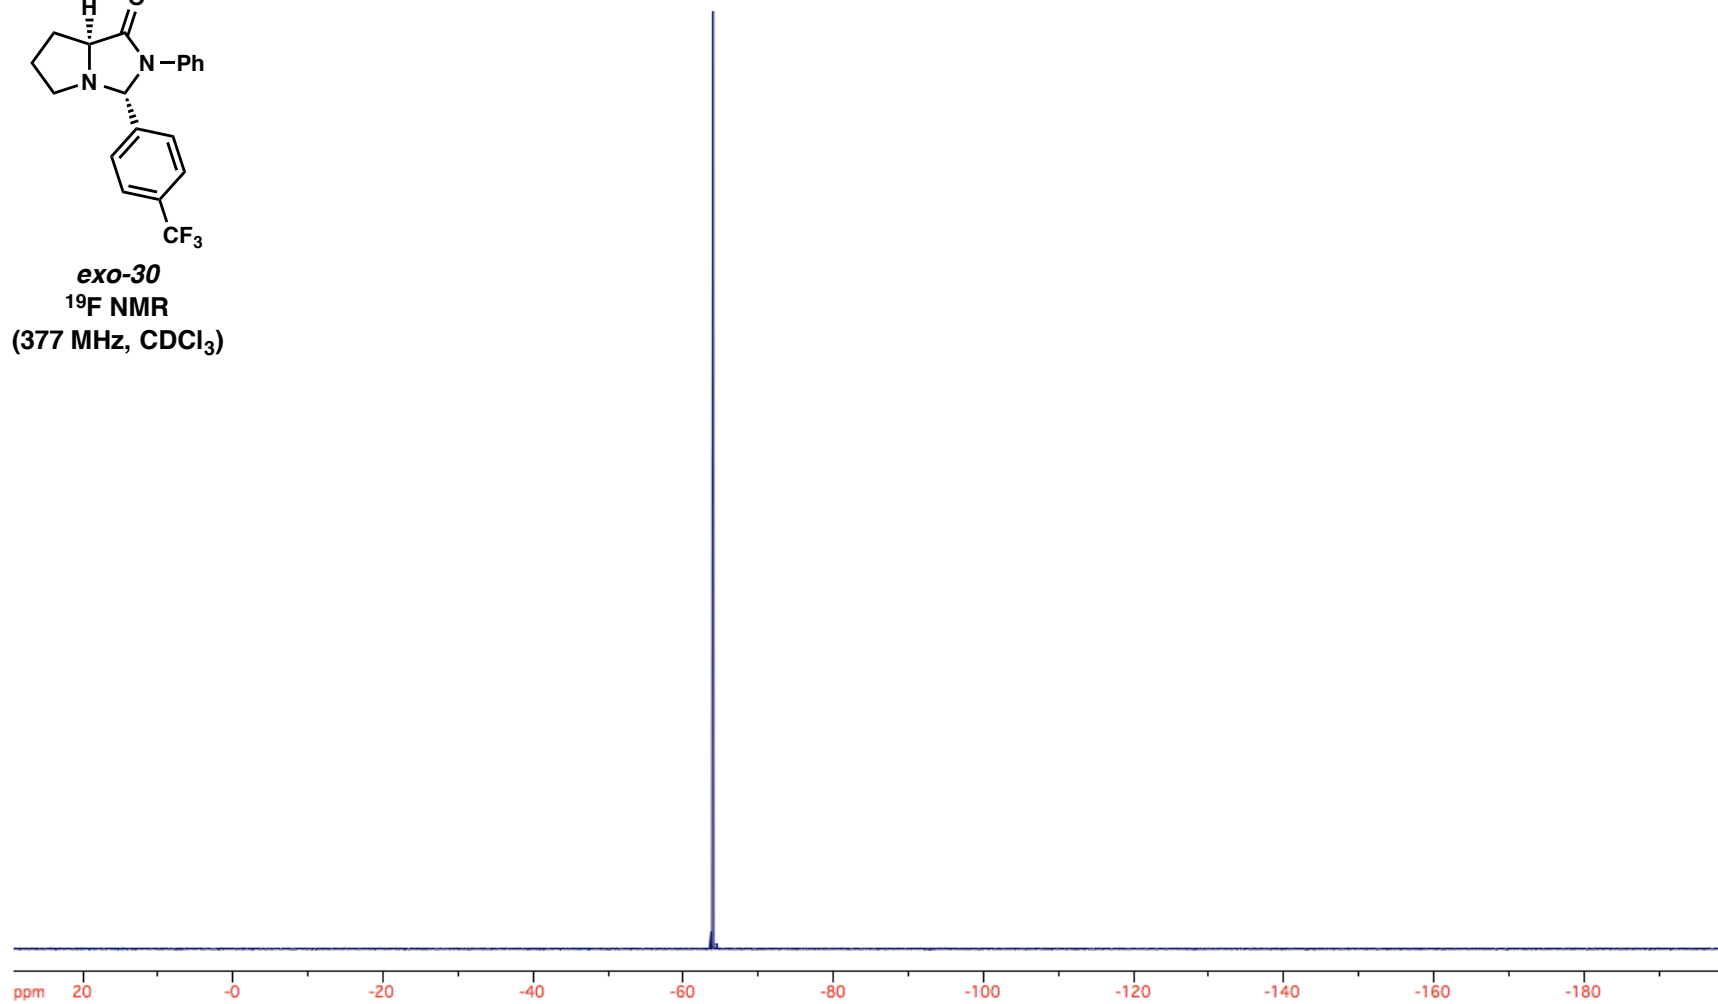

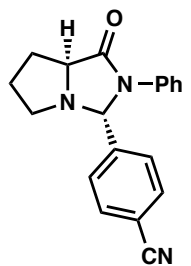

***exo-31***  
**<sup>1</sup>H NMR**  
**(400 MHz, CDCl<sub>3</sub>)**

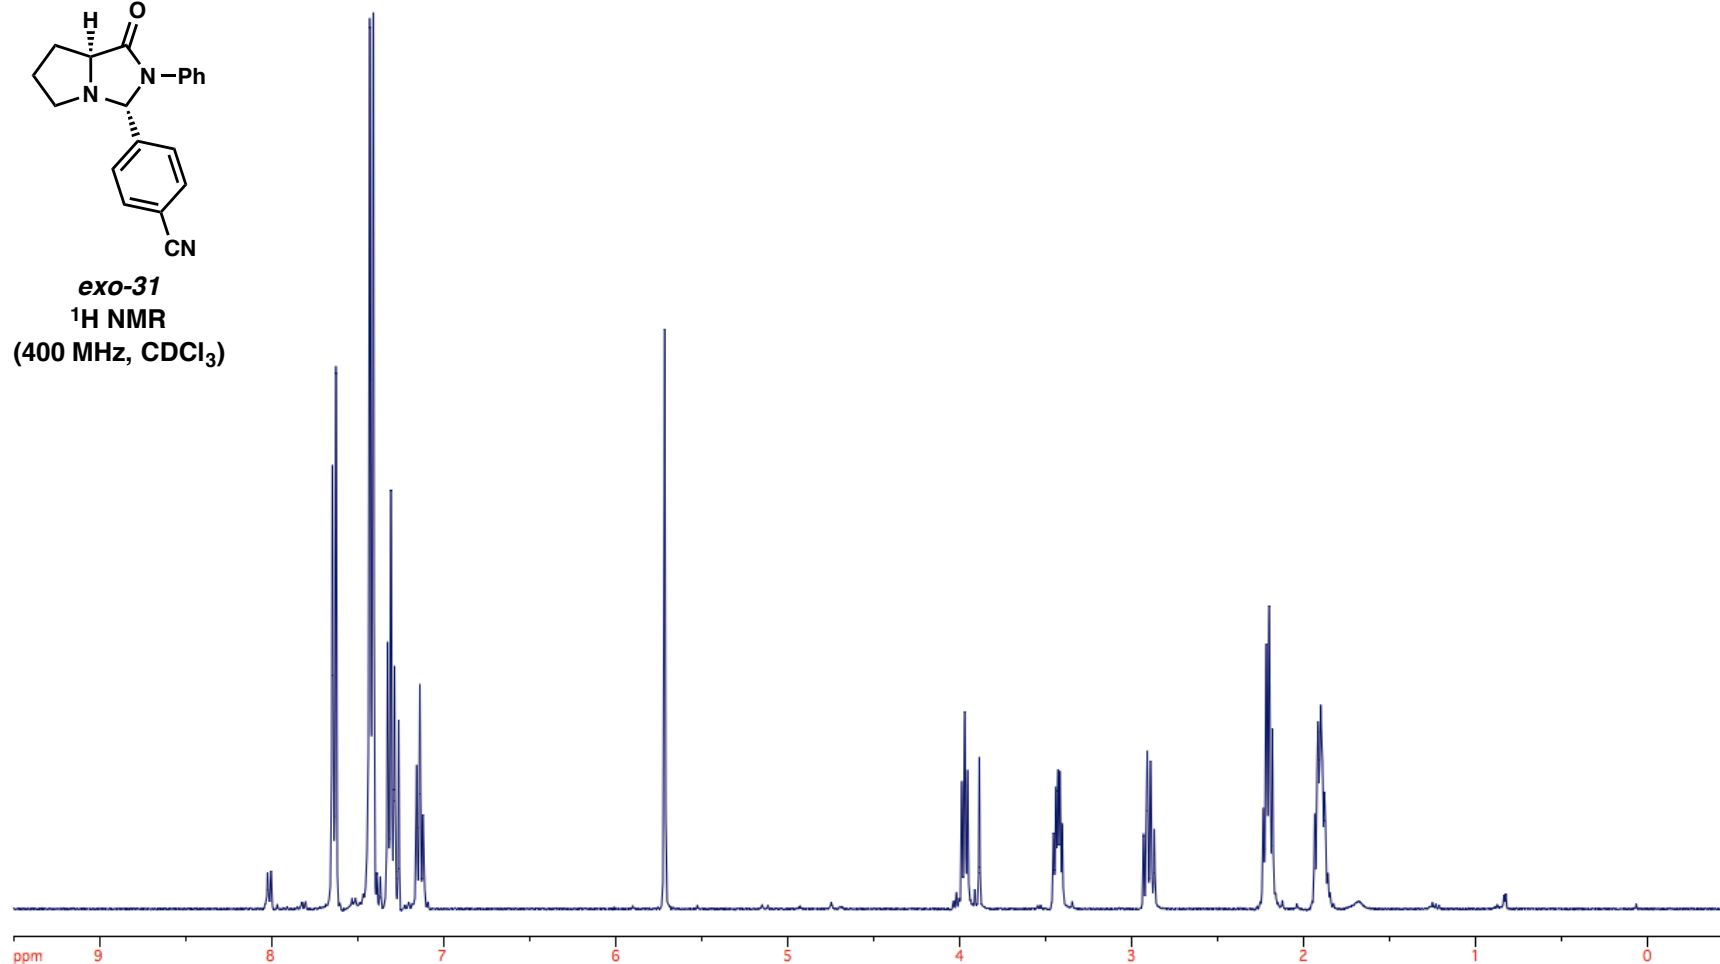

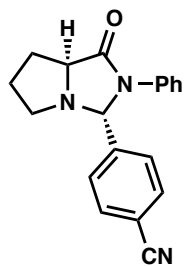

**exo-31**  
**<sup>13</sup>C NMR**  
**(100 MHz, CDCl<sub>3</sub>)**

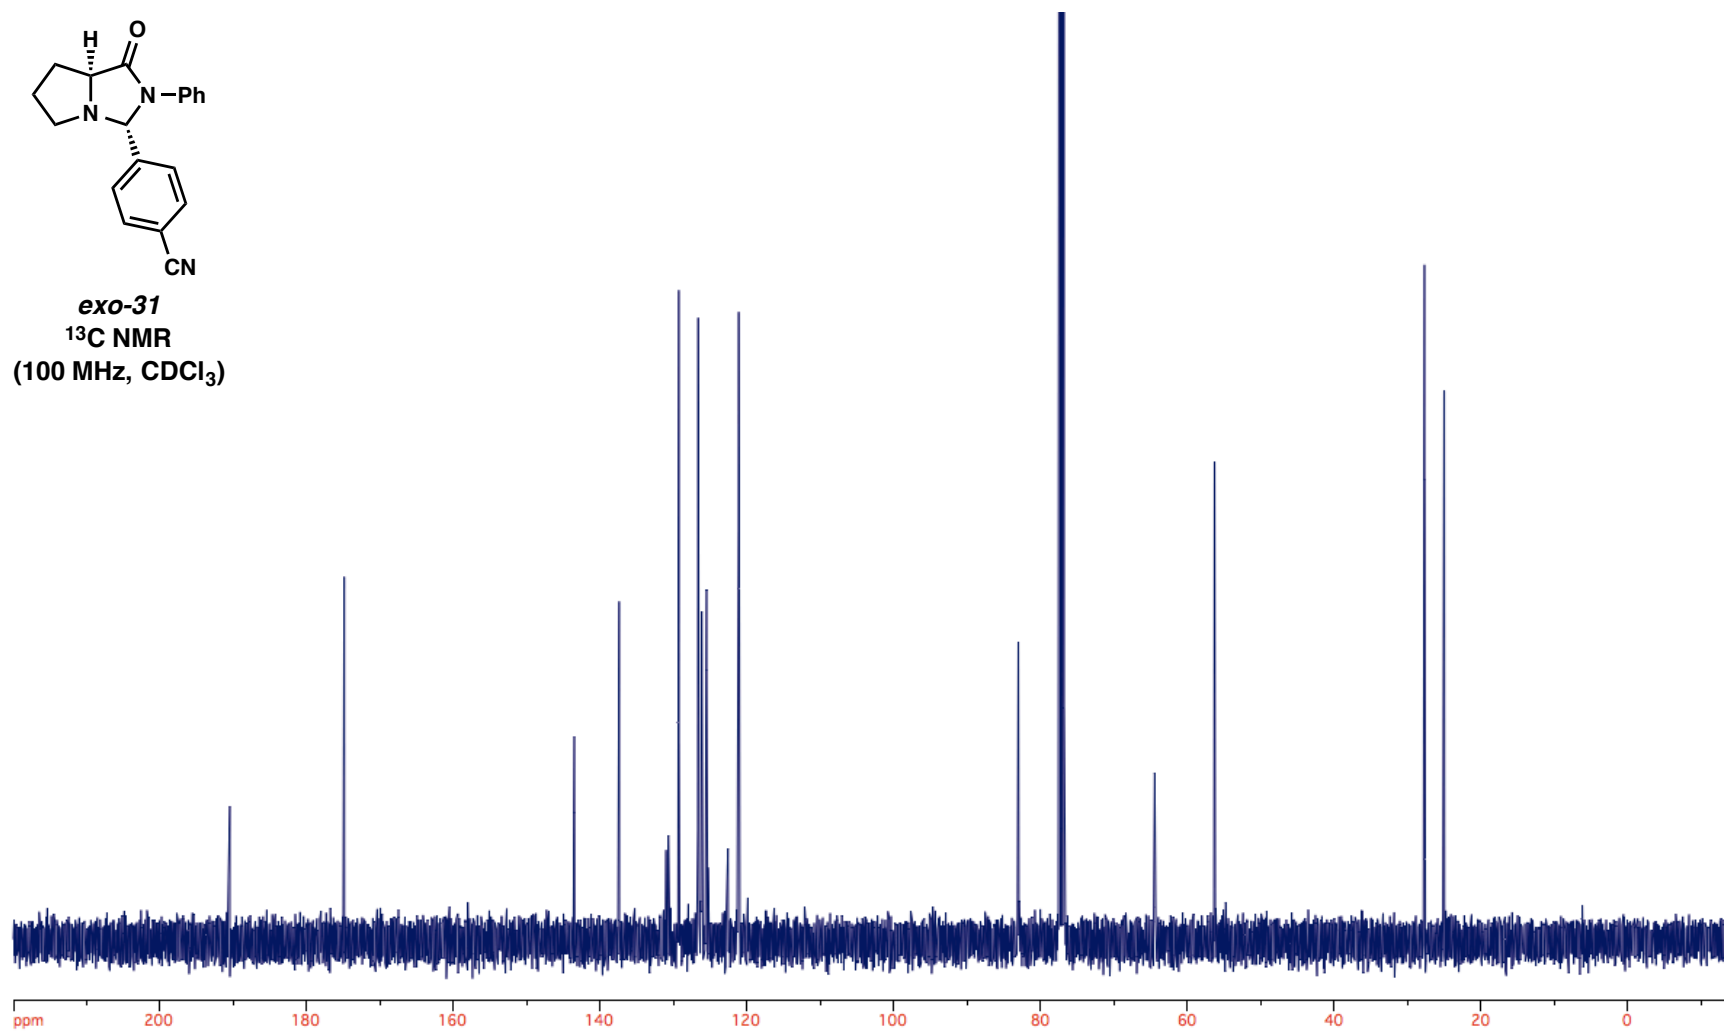

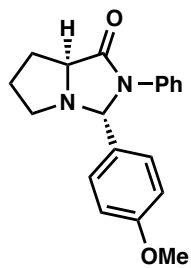

**exo-32**  
**<sup>1</sup>H NMR**  
**(400 MHz, CDCl<sub>3</sub>)**

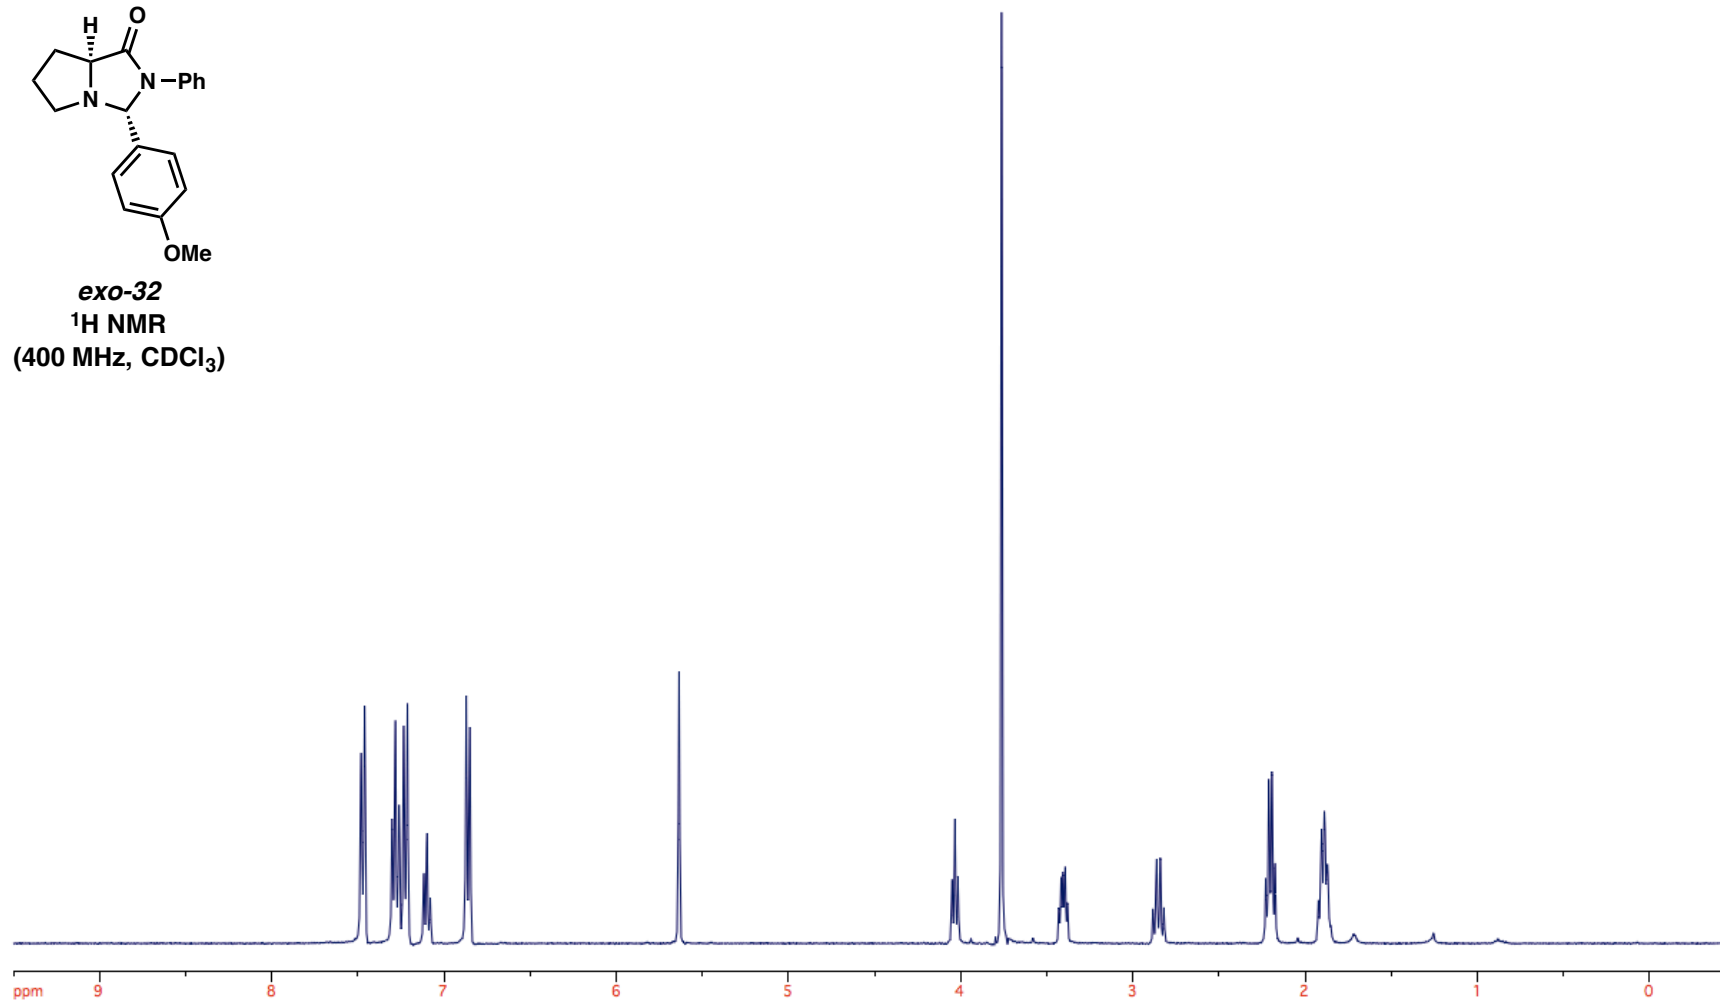

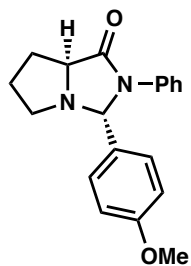

**exo-32**  
**<sup>13</sup>C NMR**  
**(100 MHz, CDCl<sub>3</sub>)**

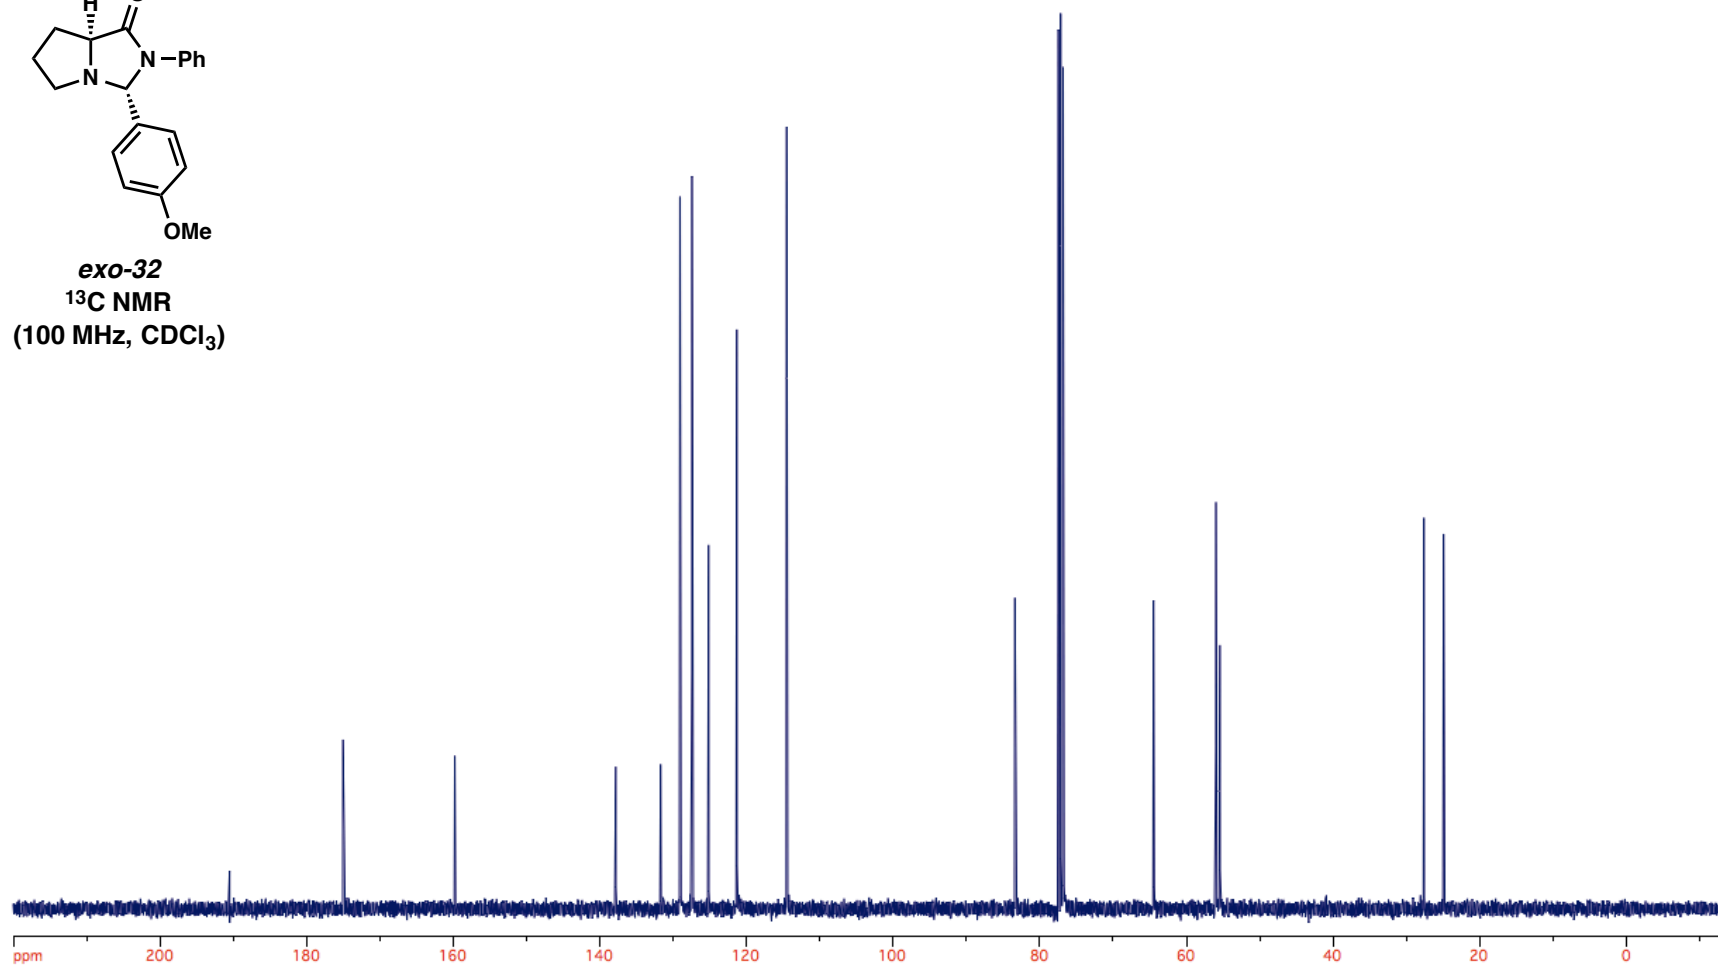



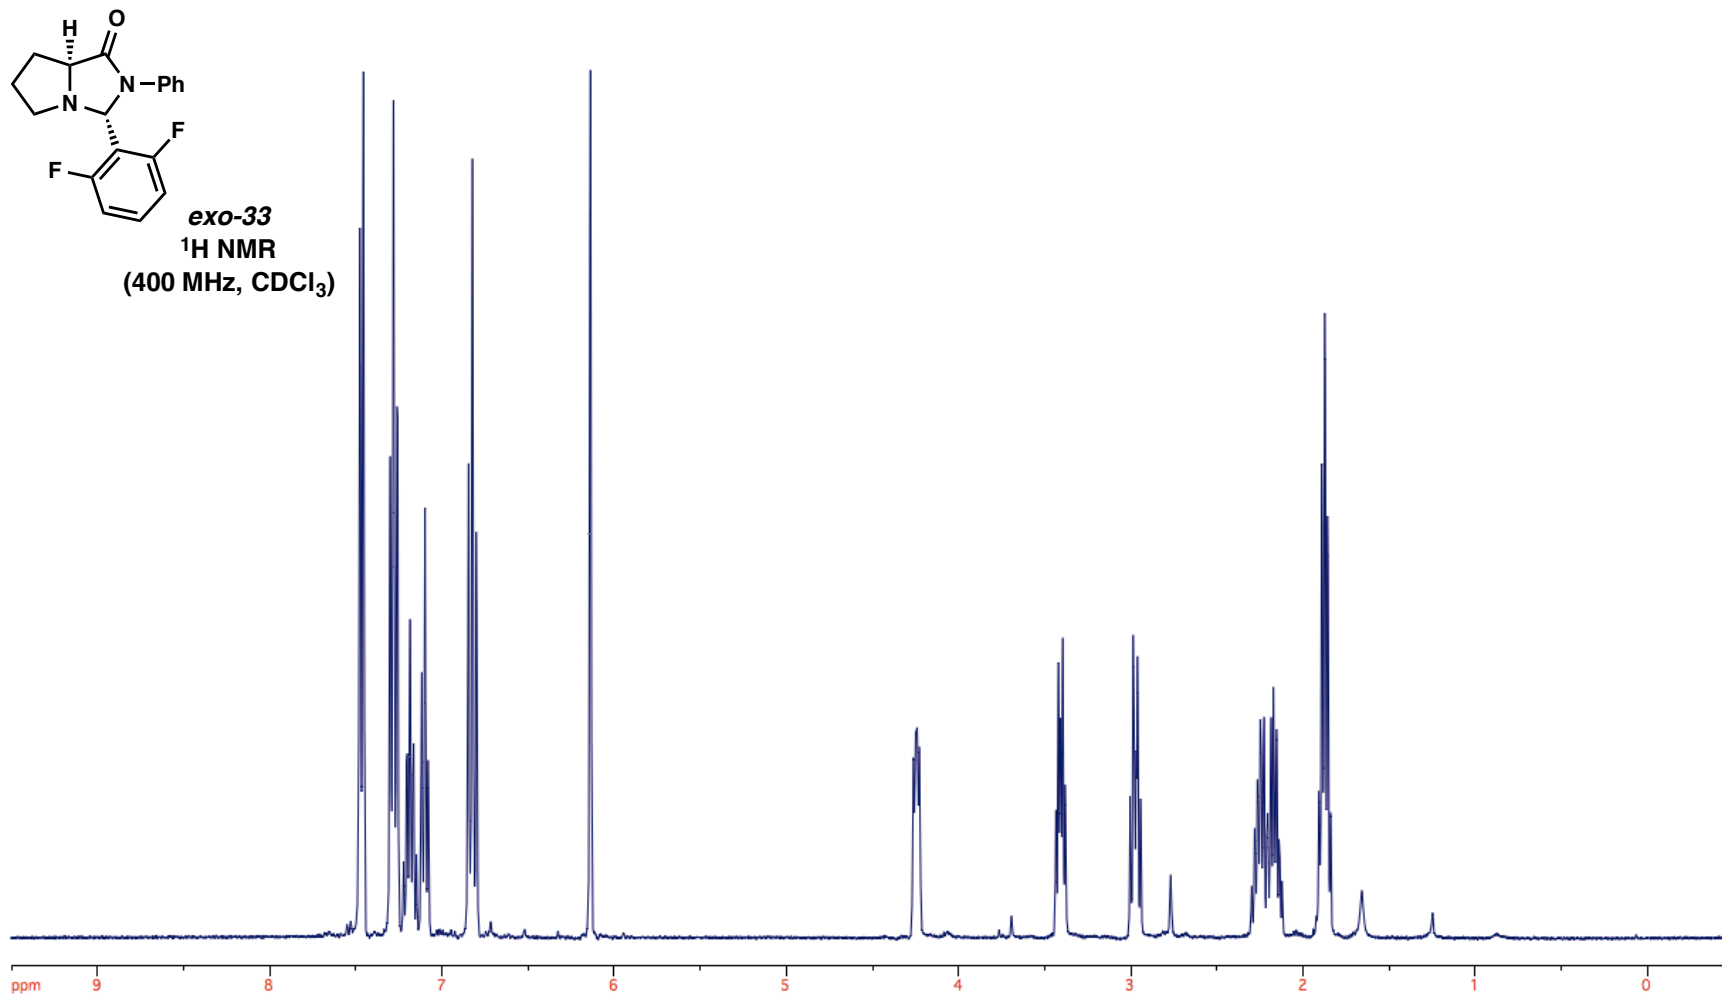

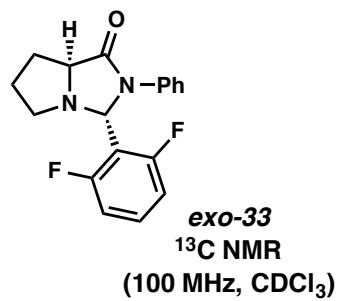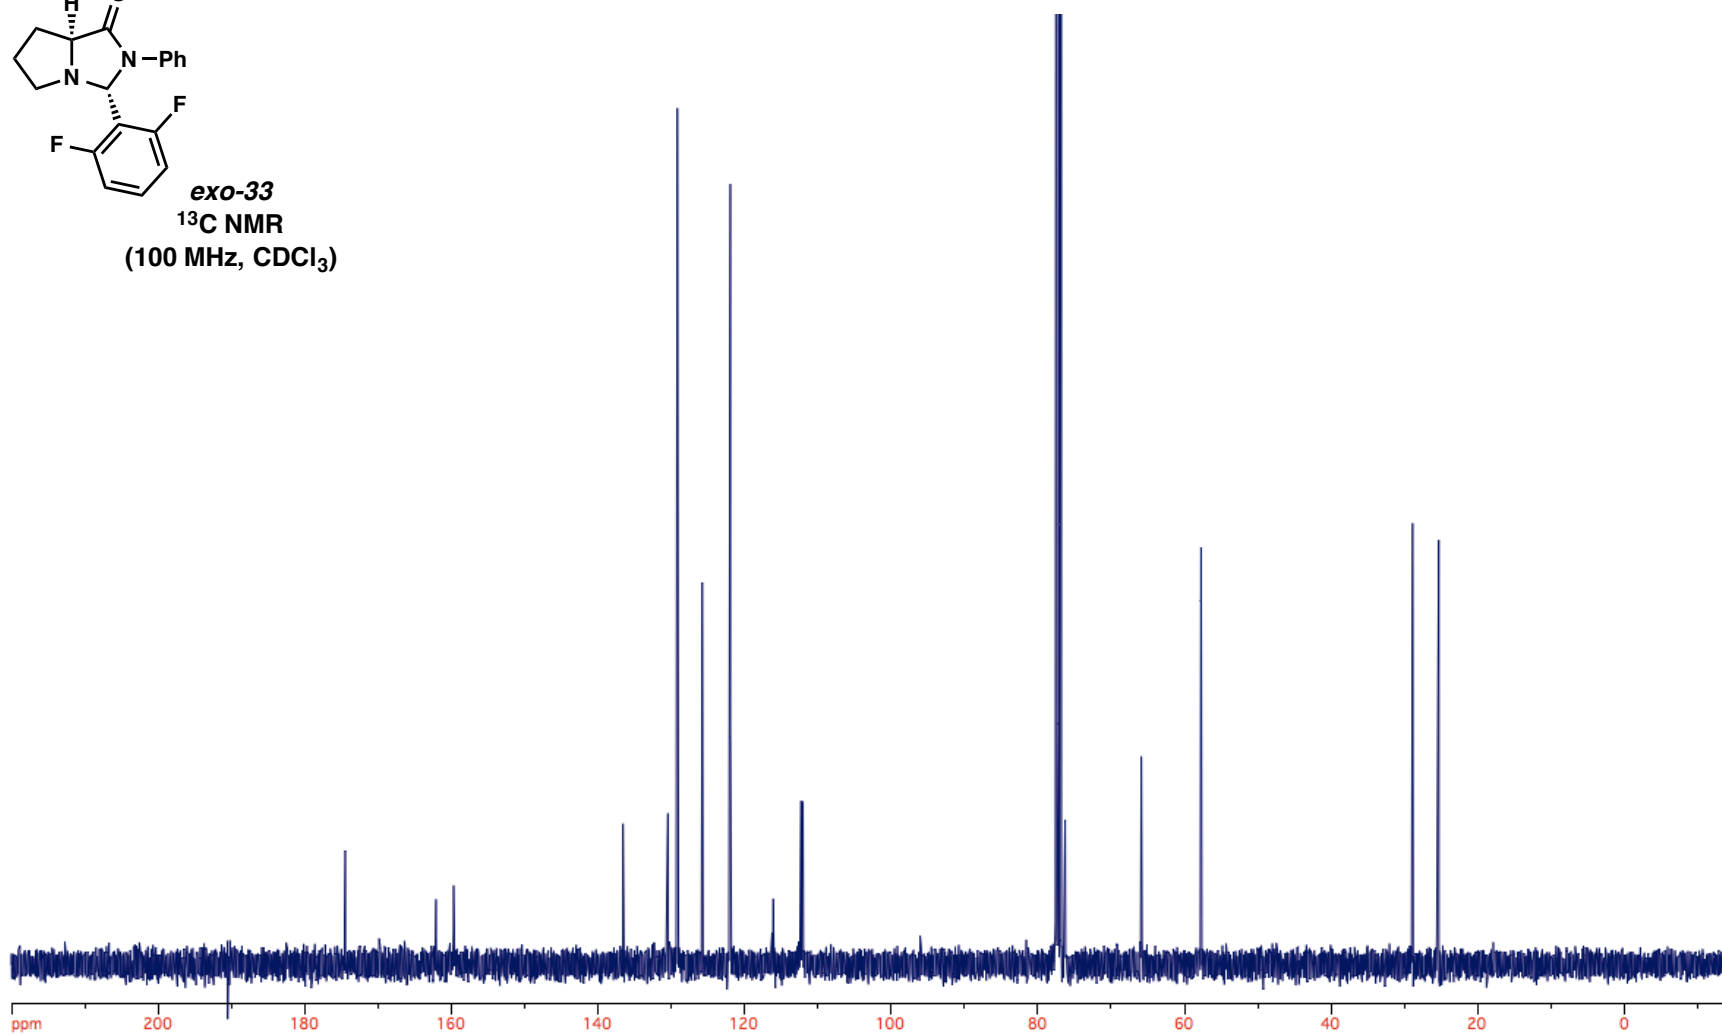

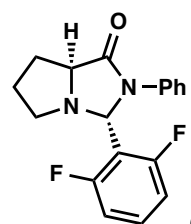

**exo-33**  
**<sup>19</sup>F NMR**  
**(377 MHz, CDCl<sub>3</sub>)**

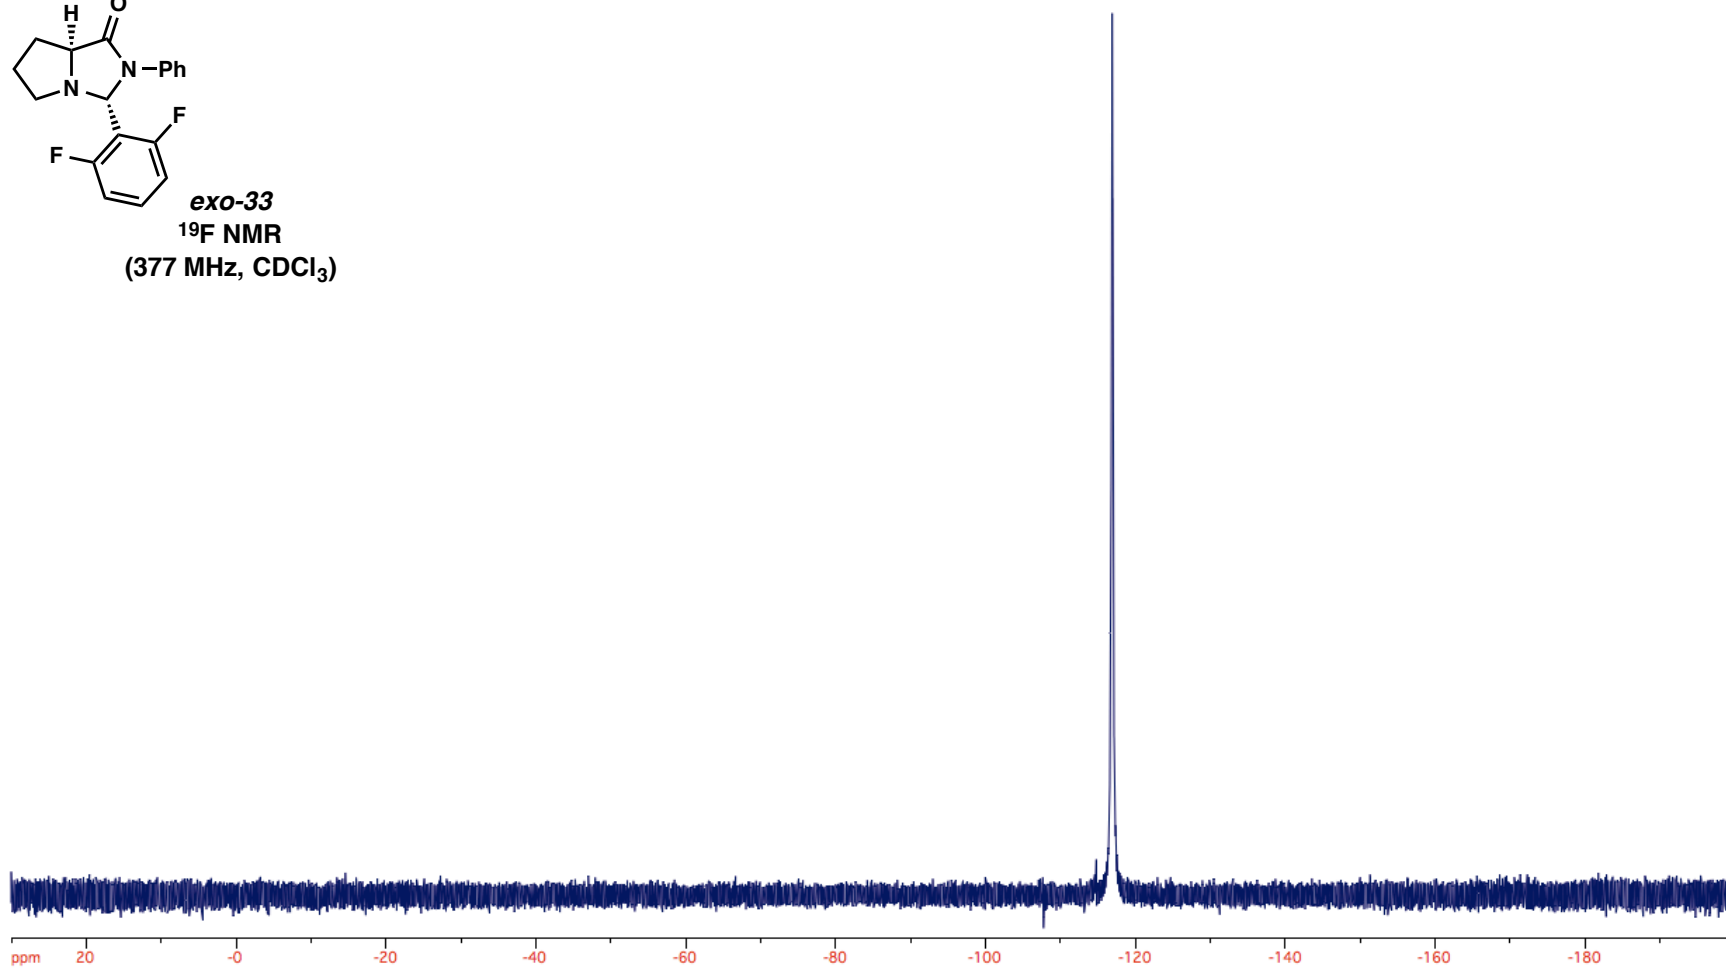

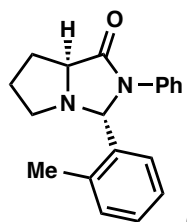

**exo-34**  
**<sup>1</sup>H NMR**  
**(400 MHz, CDCl<sub>3</sub>)**

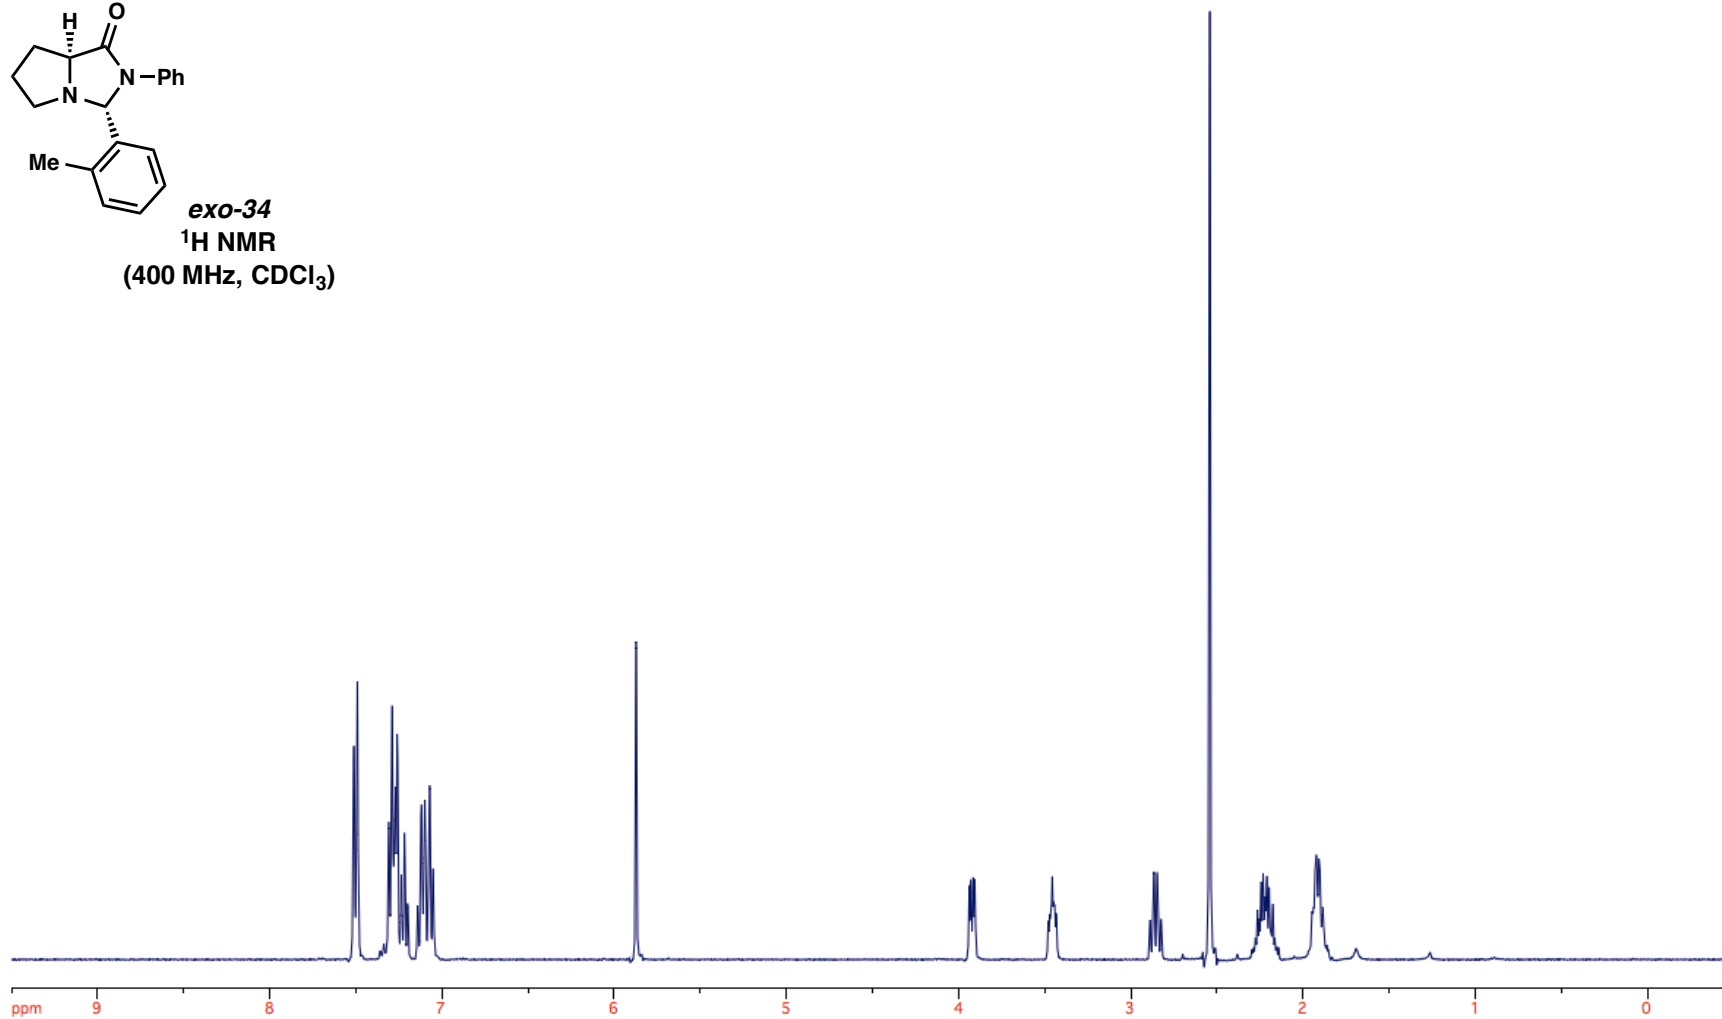

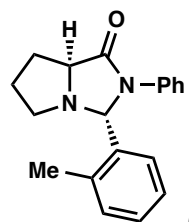

**exo-34**  
**<sup>13</sup>C NMR**  
**(100 MHz, CDCl<sub>3</sub>)**

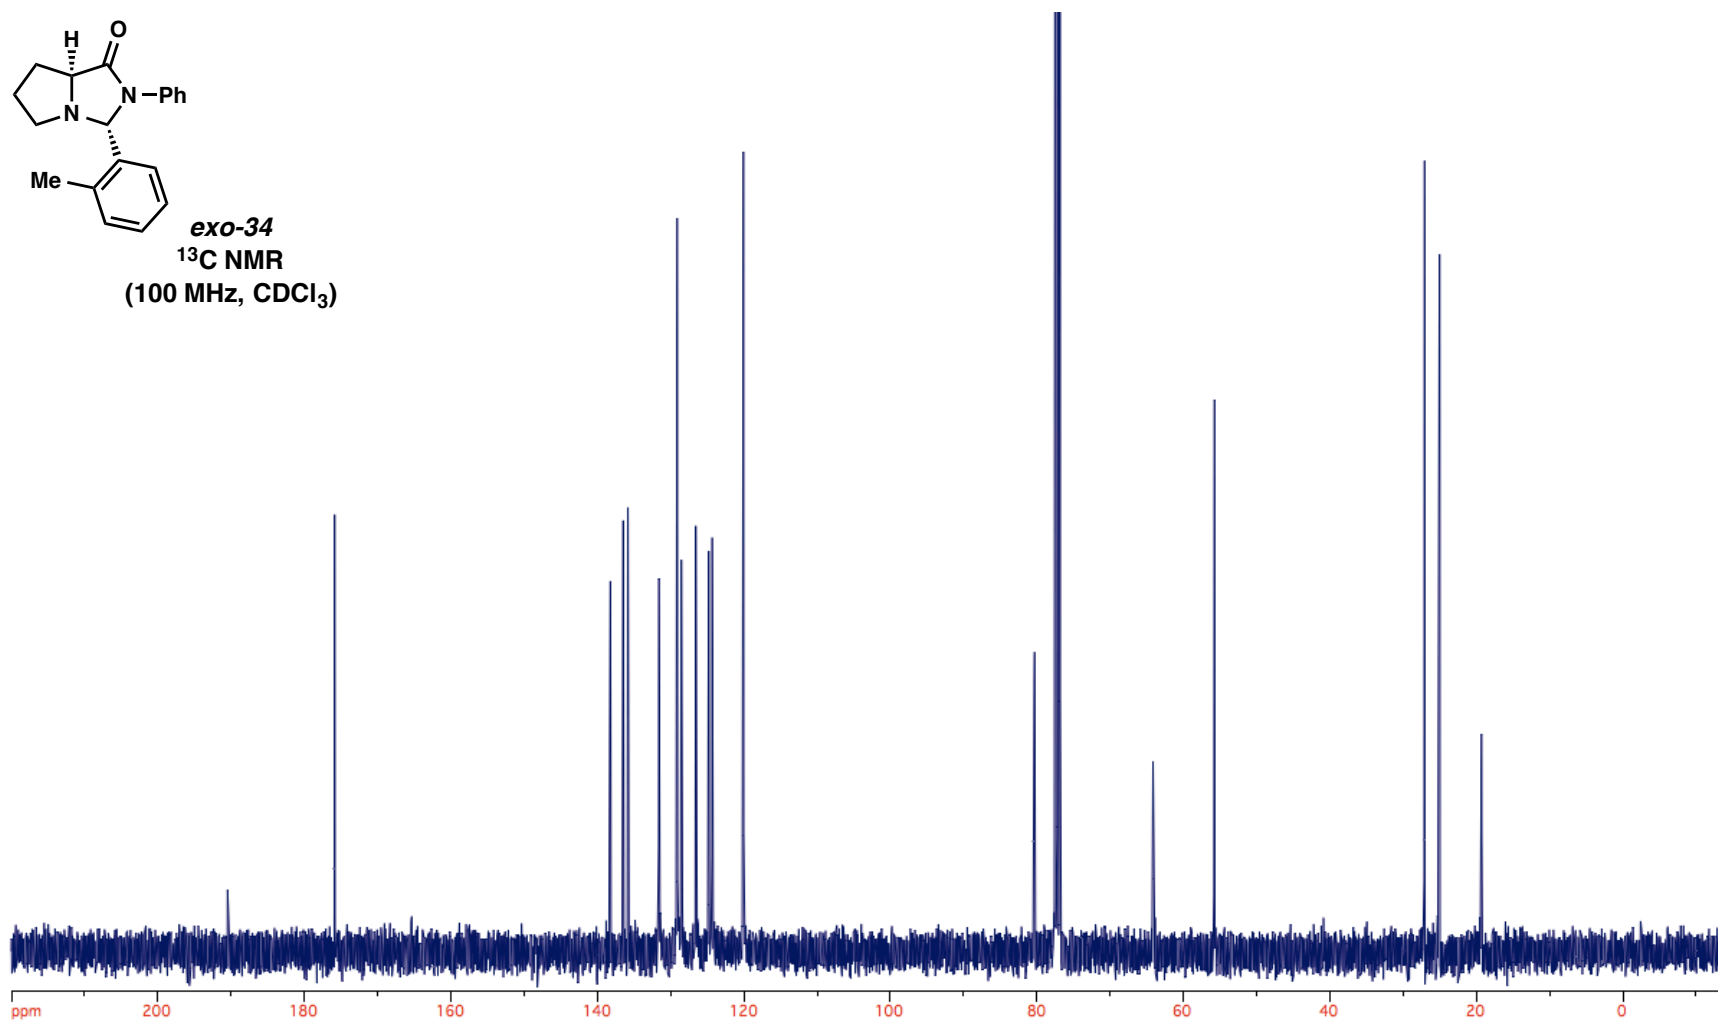

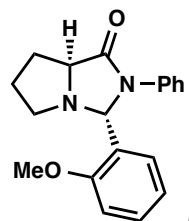

*exo-35*  
<sup>1</sup>H NMR  
(400 MHz, CDCl<sub>3</sub>)

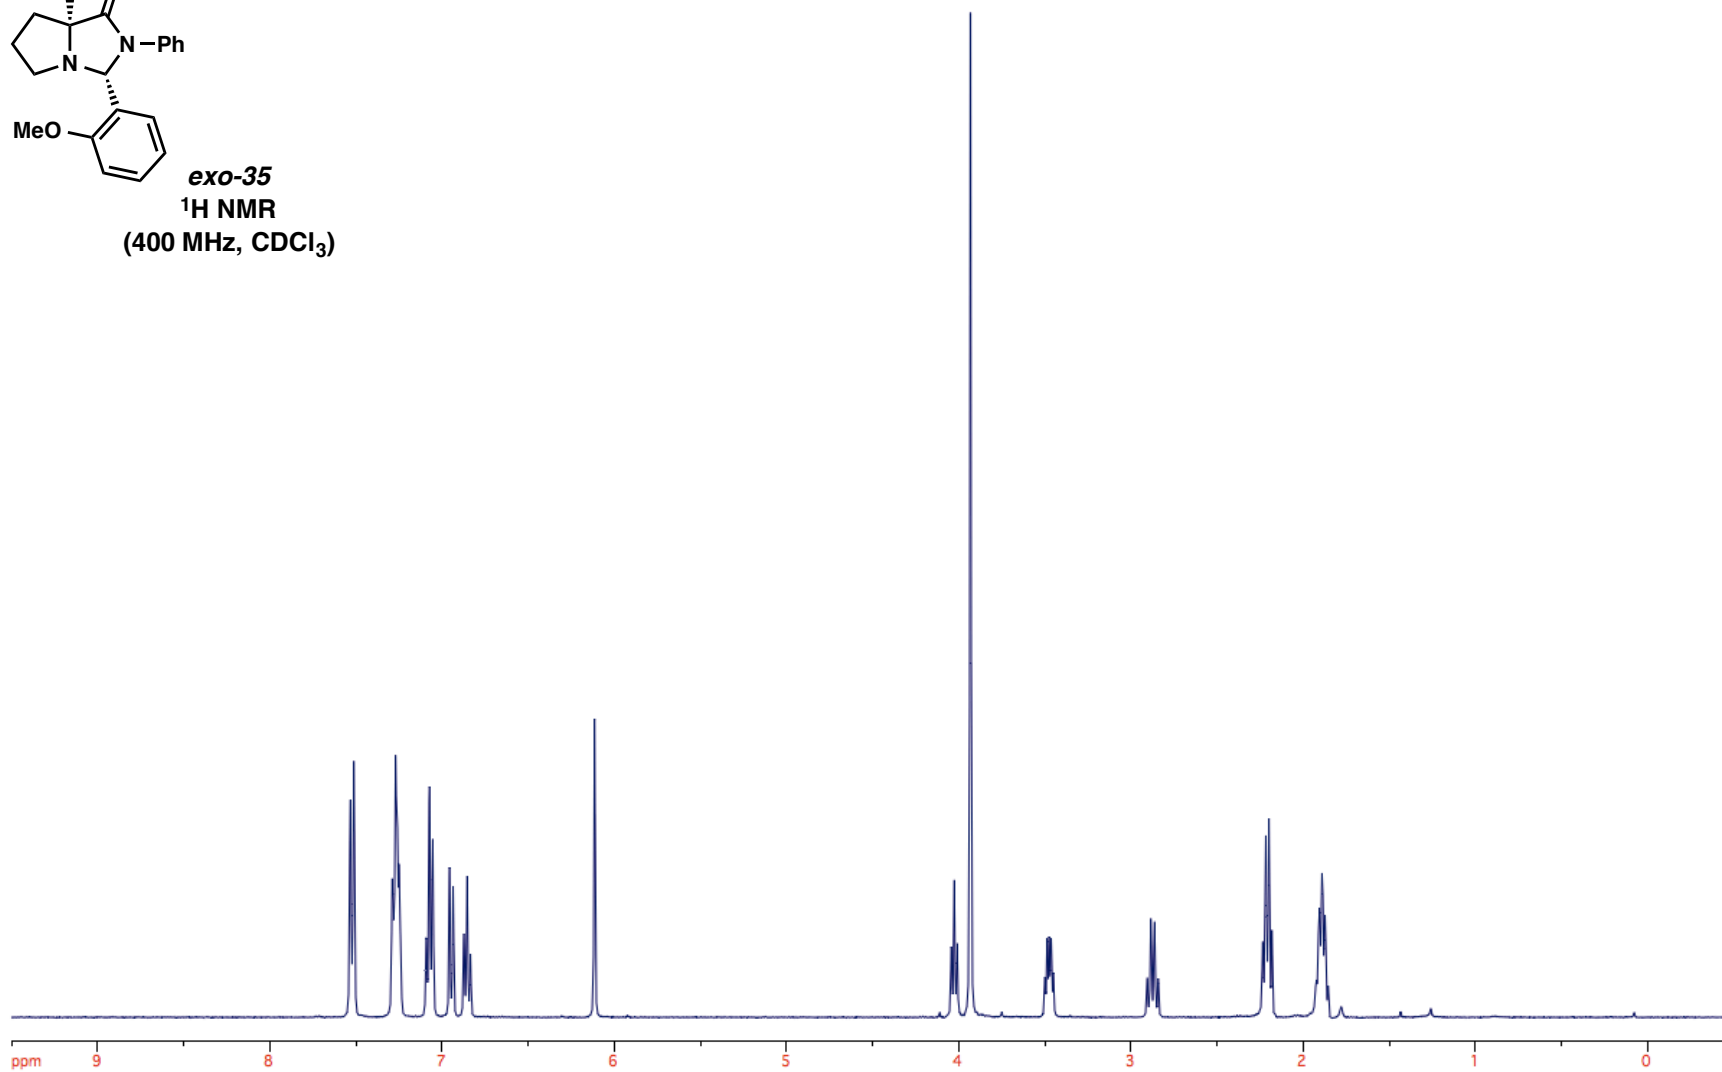

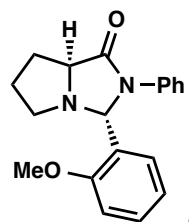

**exo-35**  
**<sup>13</sup>C NMR**  
**(100 MHz, CDCl<sub>3</sub>)**

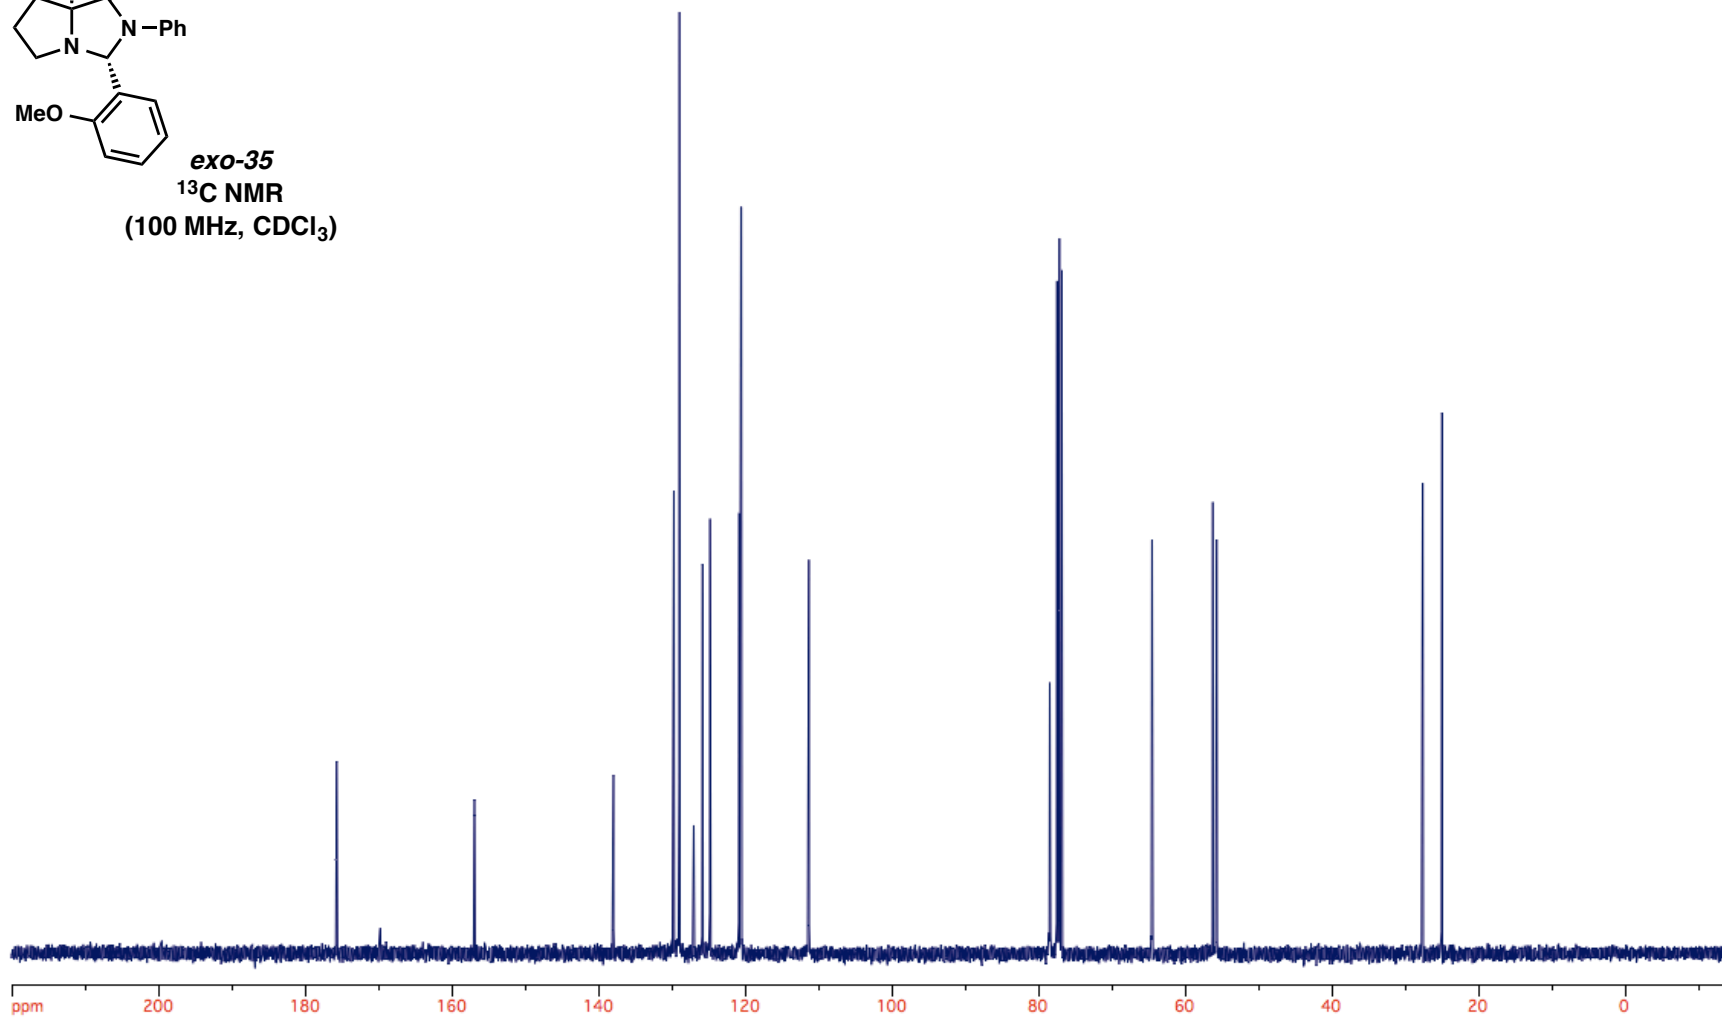

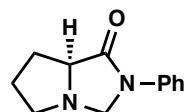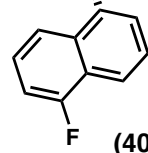

**exo-42**  
**<sup>1</sup>H NMR**  
**(400 MHz, CDCl<sub>3</sub>)**

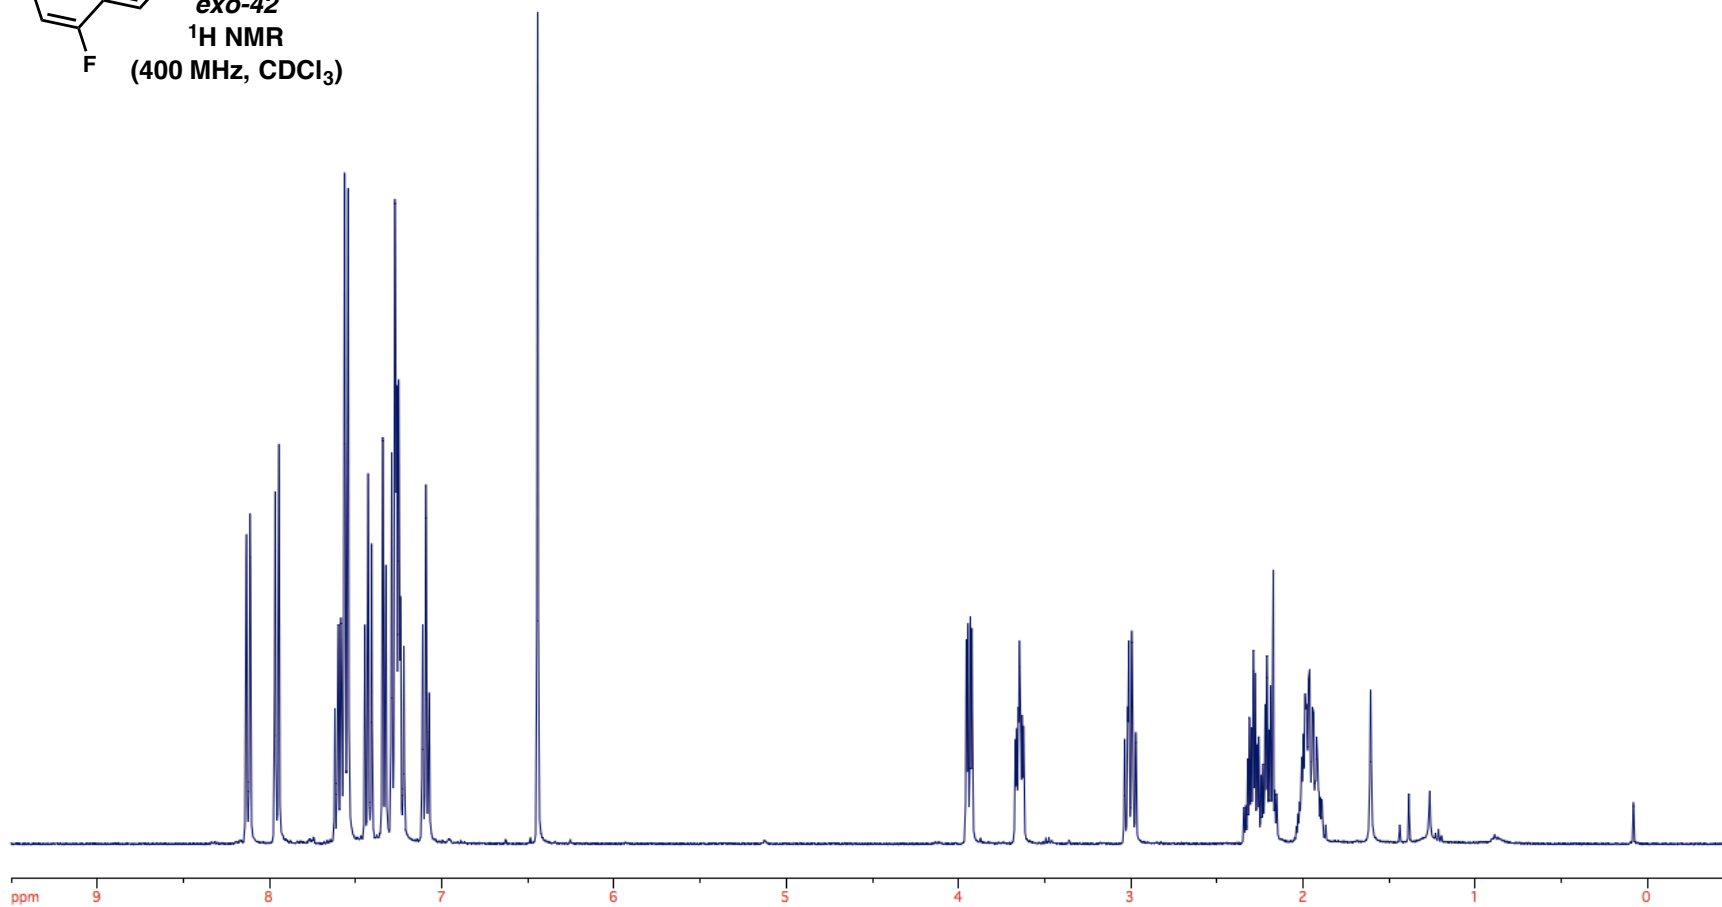



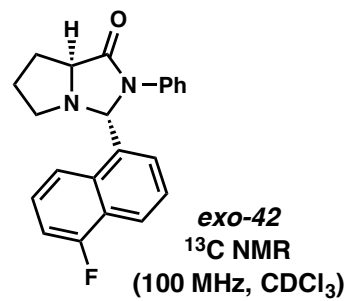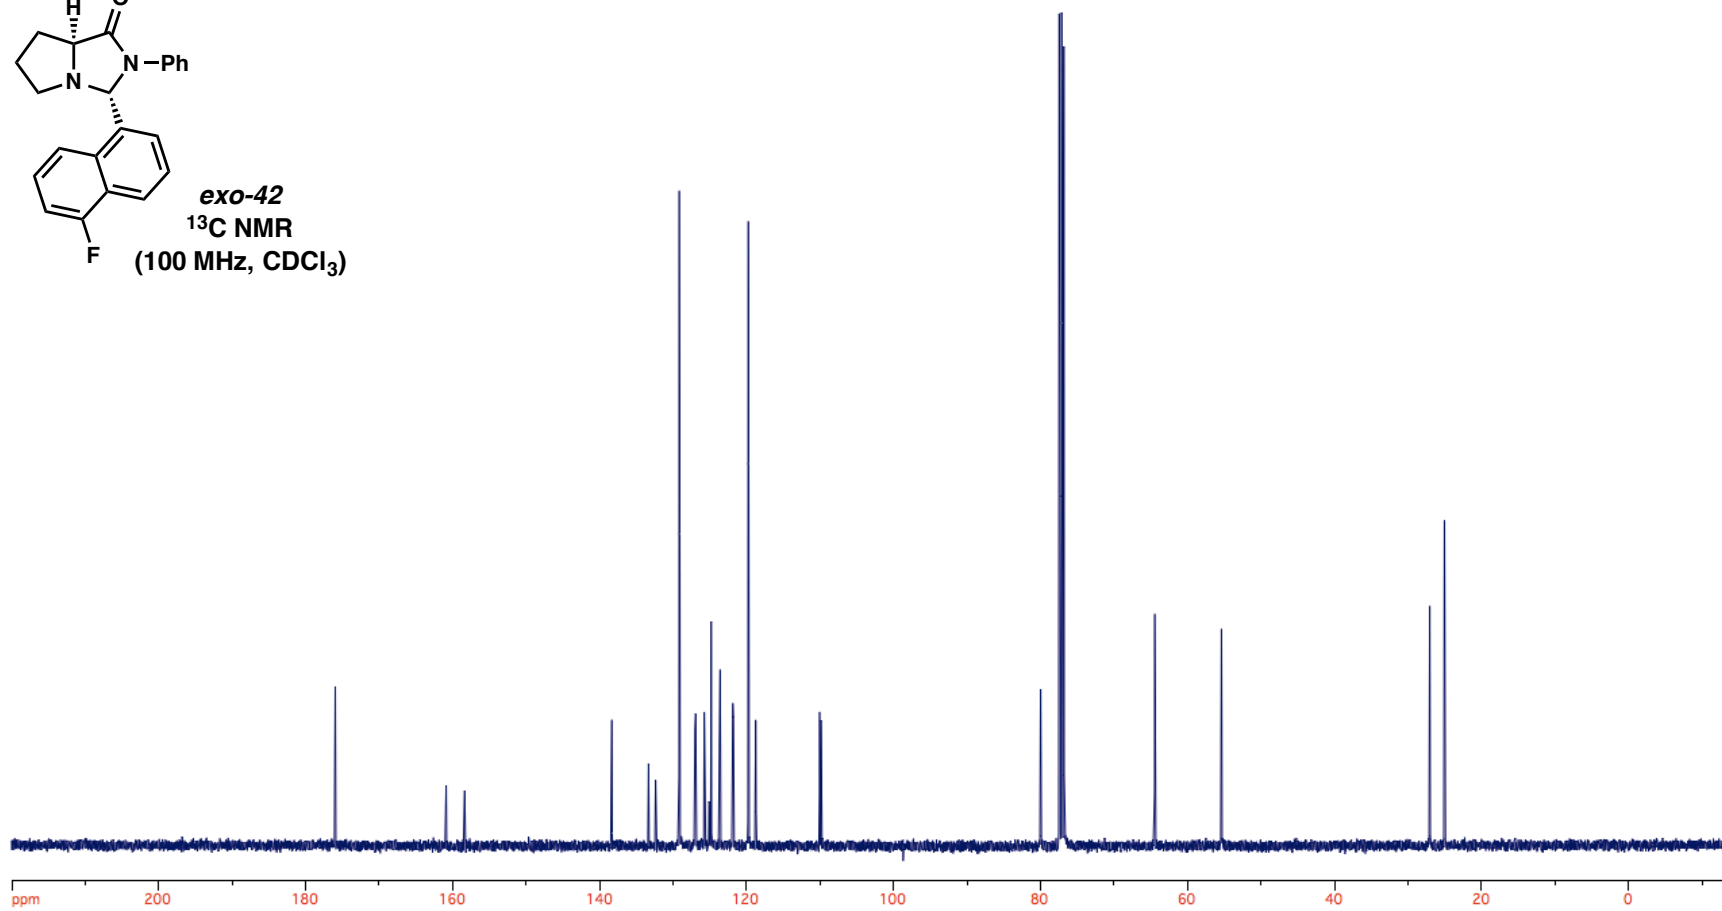

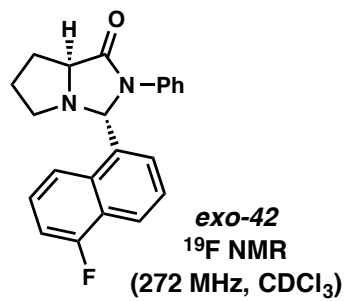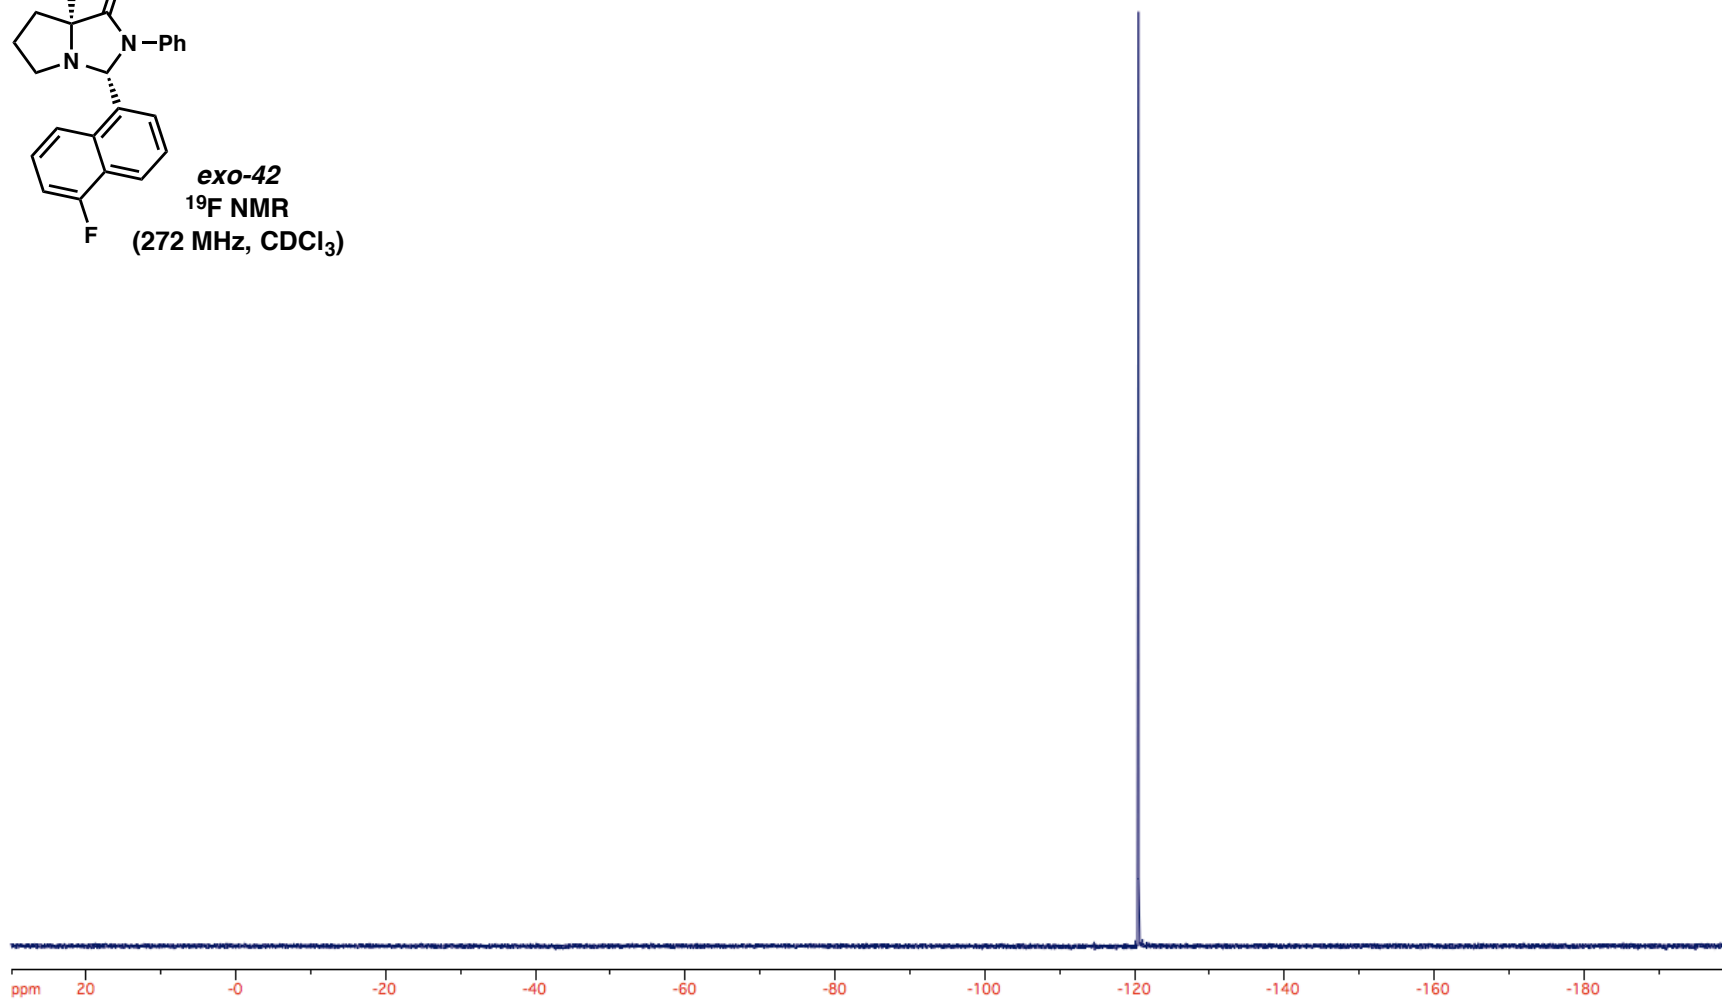

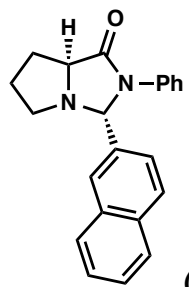

*exo*-43  
 $^1\text{H}$  NMR  
(400 MHz,  $\text{CDCl}_3$ )

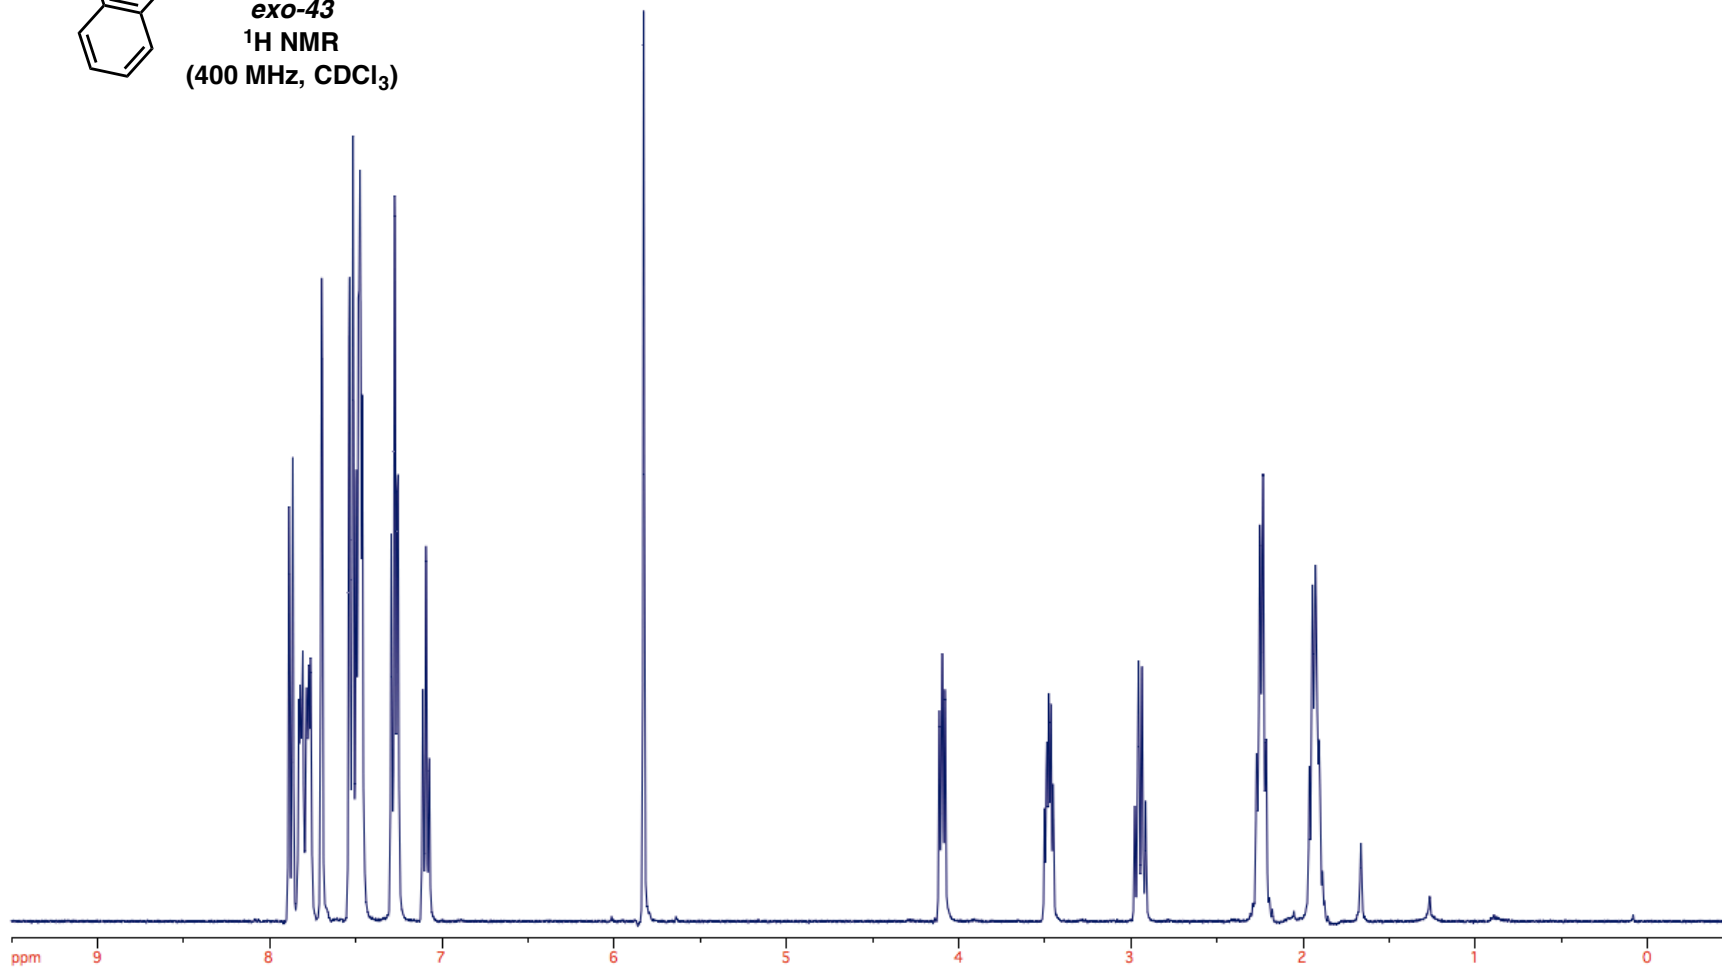

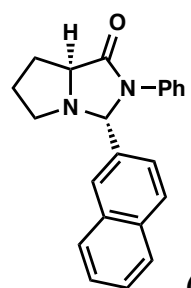

**exo-43**  
**<sup>13</sup>C NMR**  
**(100 MHz, CDCl<sub>3</sub>)**

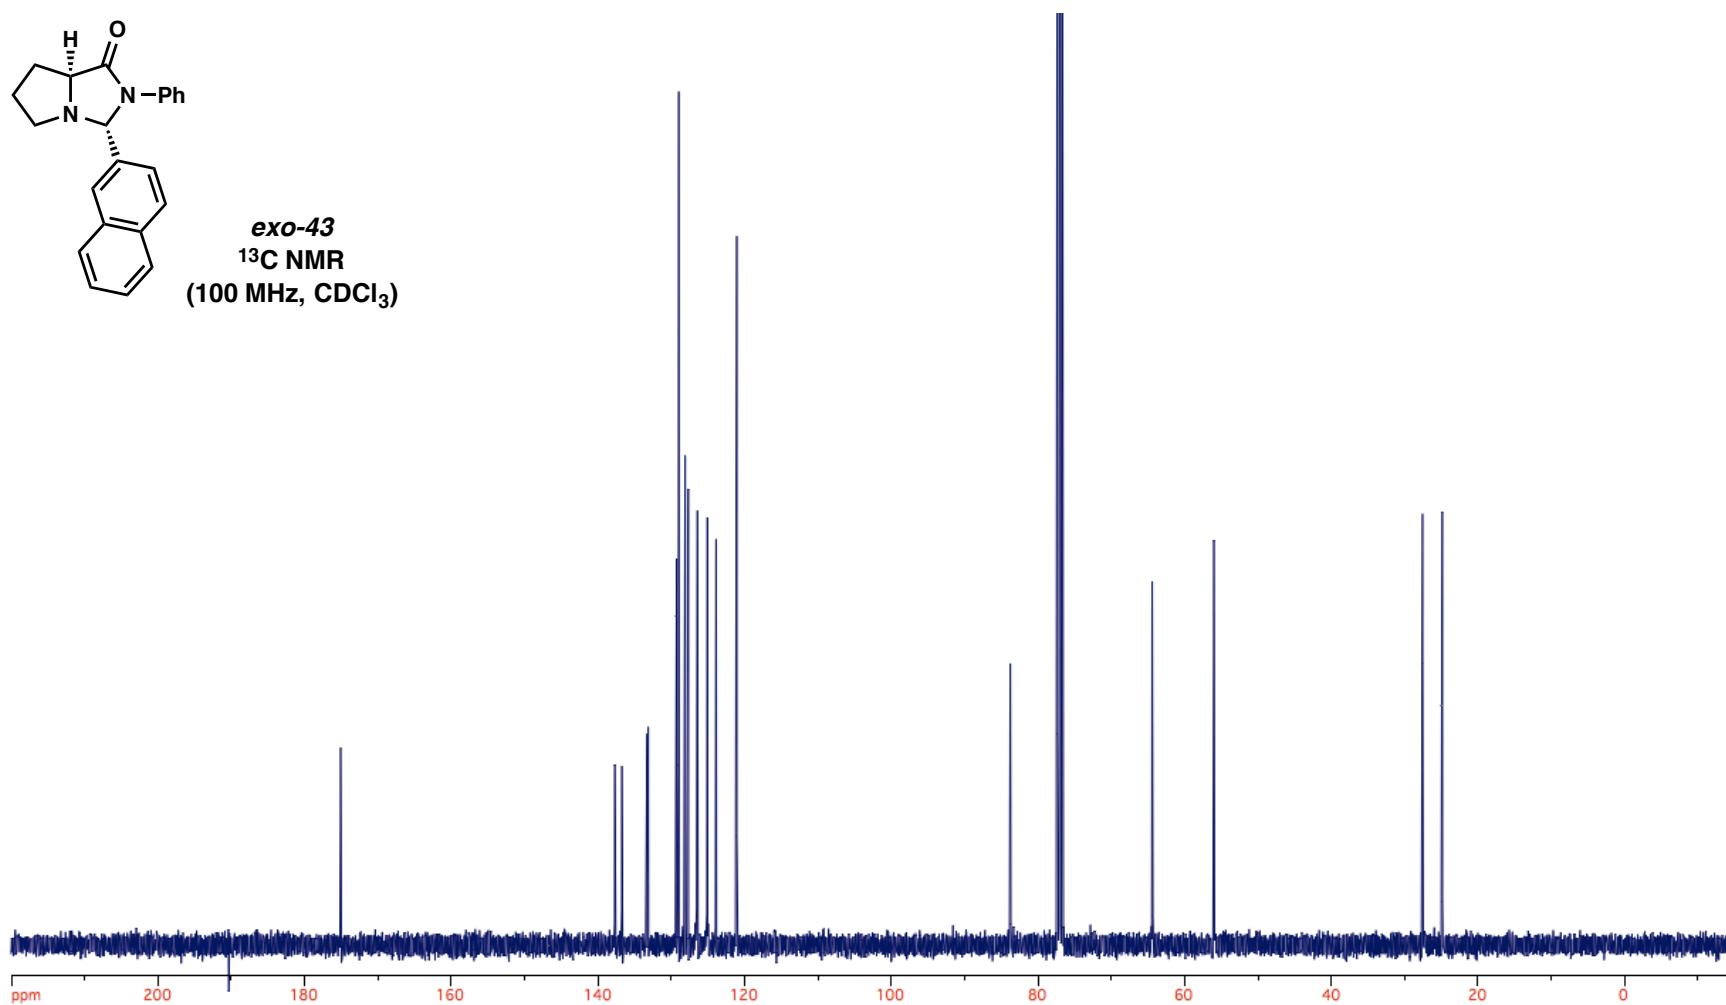

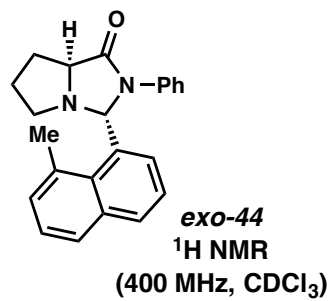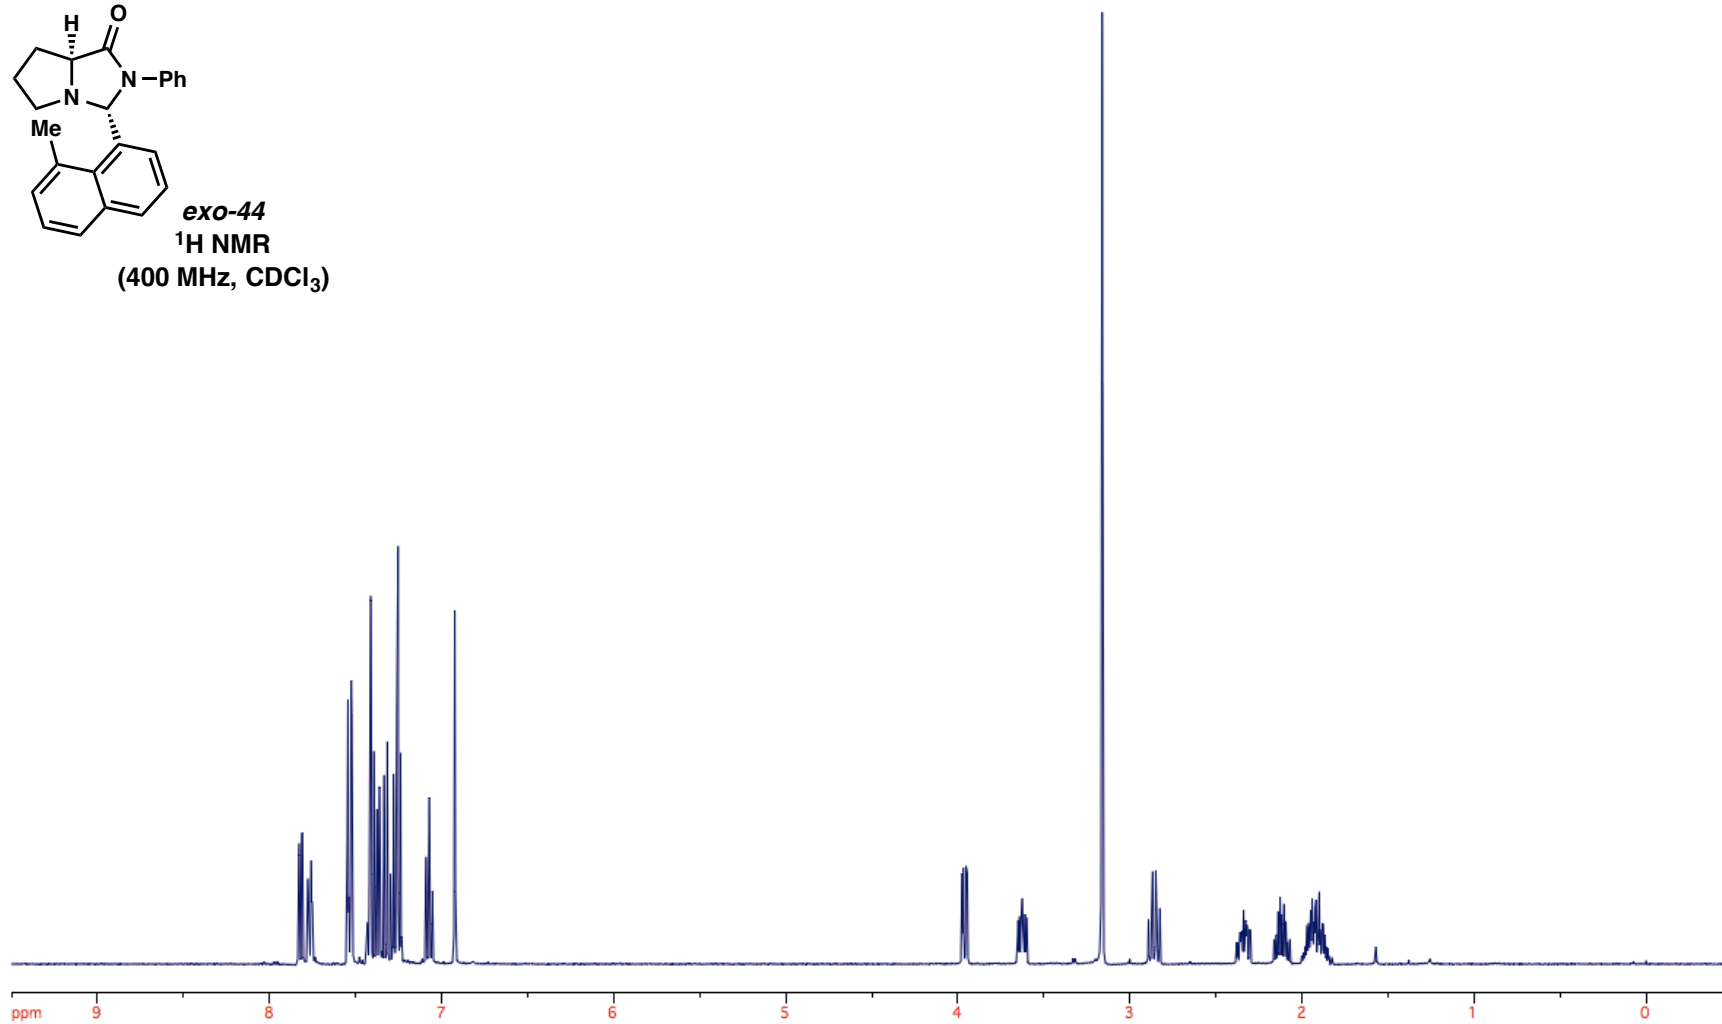

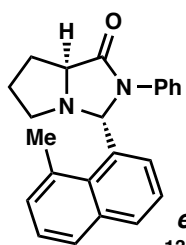

**exo-44**  
**<sup>13</sup>C NMR**  
**(100 MHz, CDCl<sub>3</sub>)**

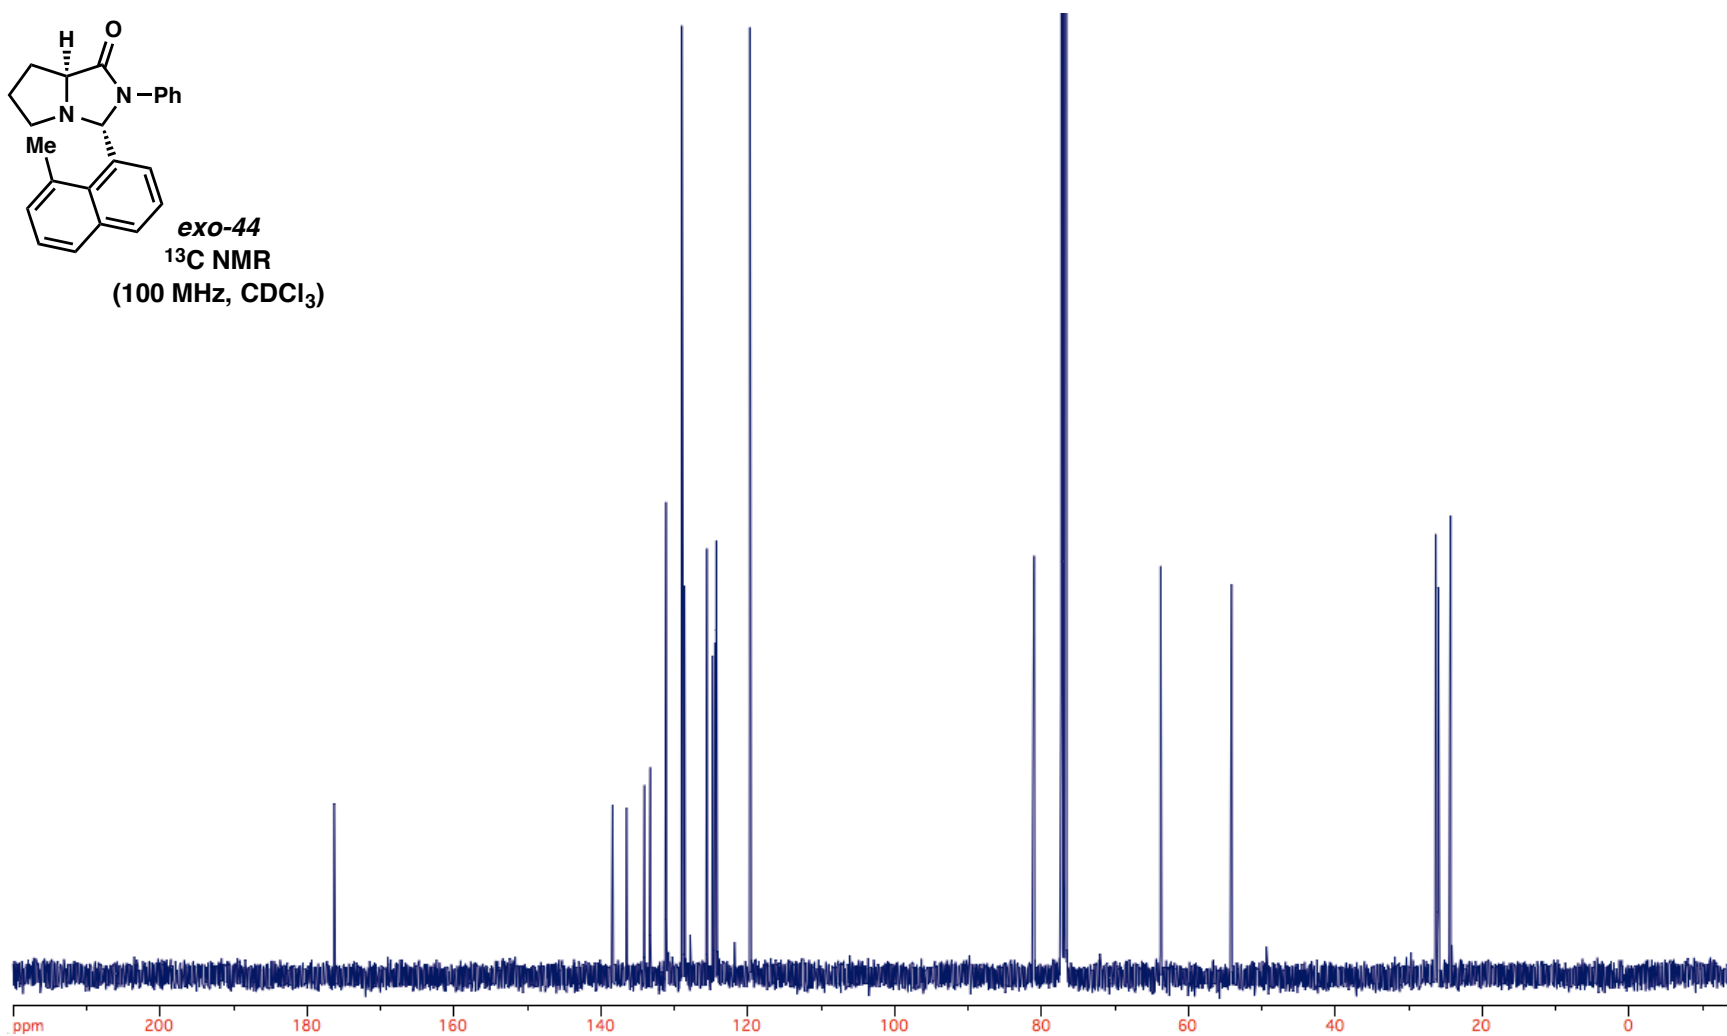

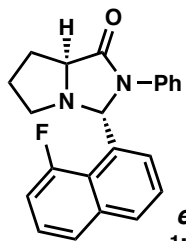

*exo-45*  
<sup>1</sup>H NMR  
(400 MHz, CDCl<sub>3</sub>)

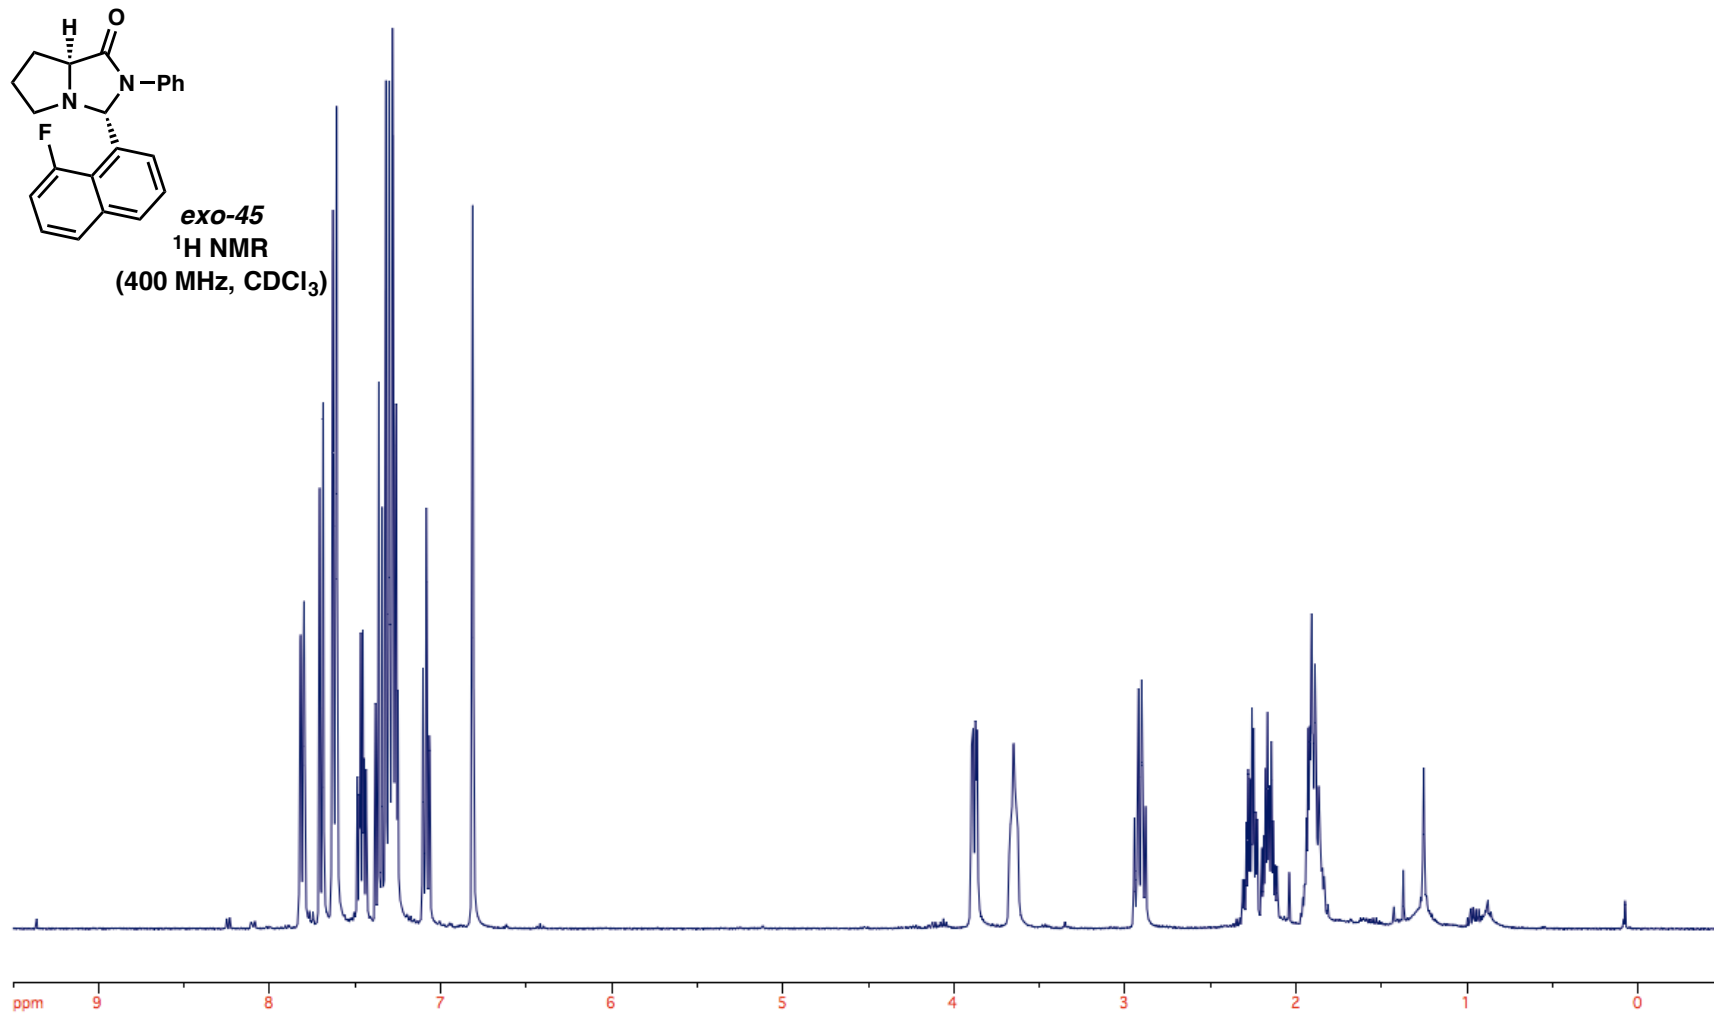

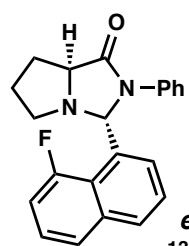

*exo-45*  
<sup>13</sup>C NMR  
(100 MHz, CDCl<sub>3</sub>)

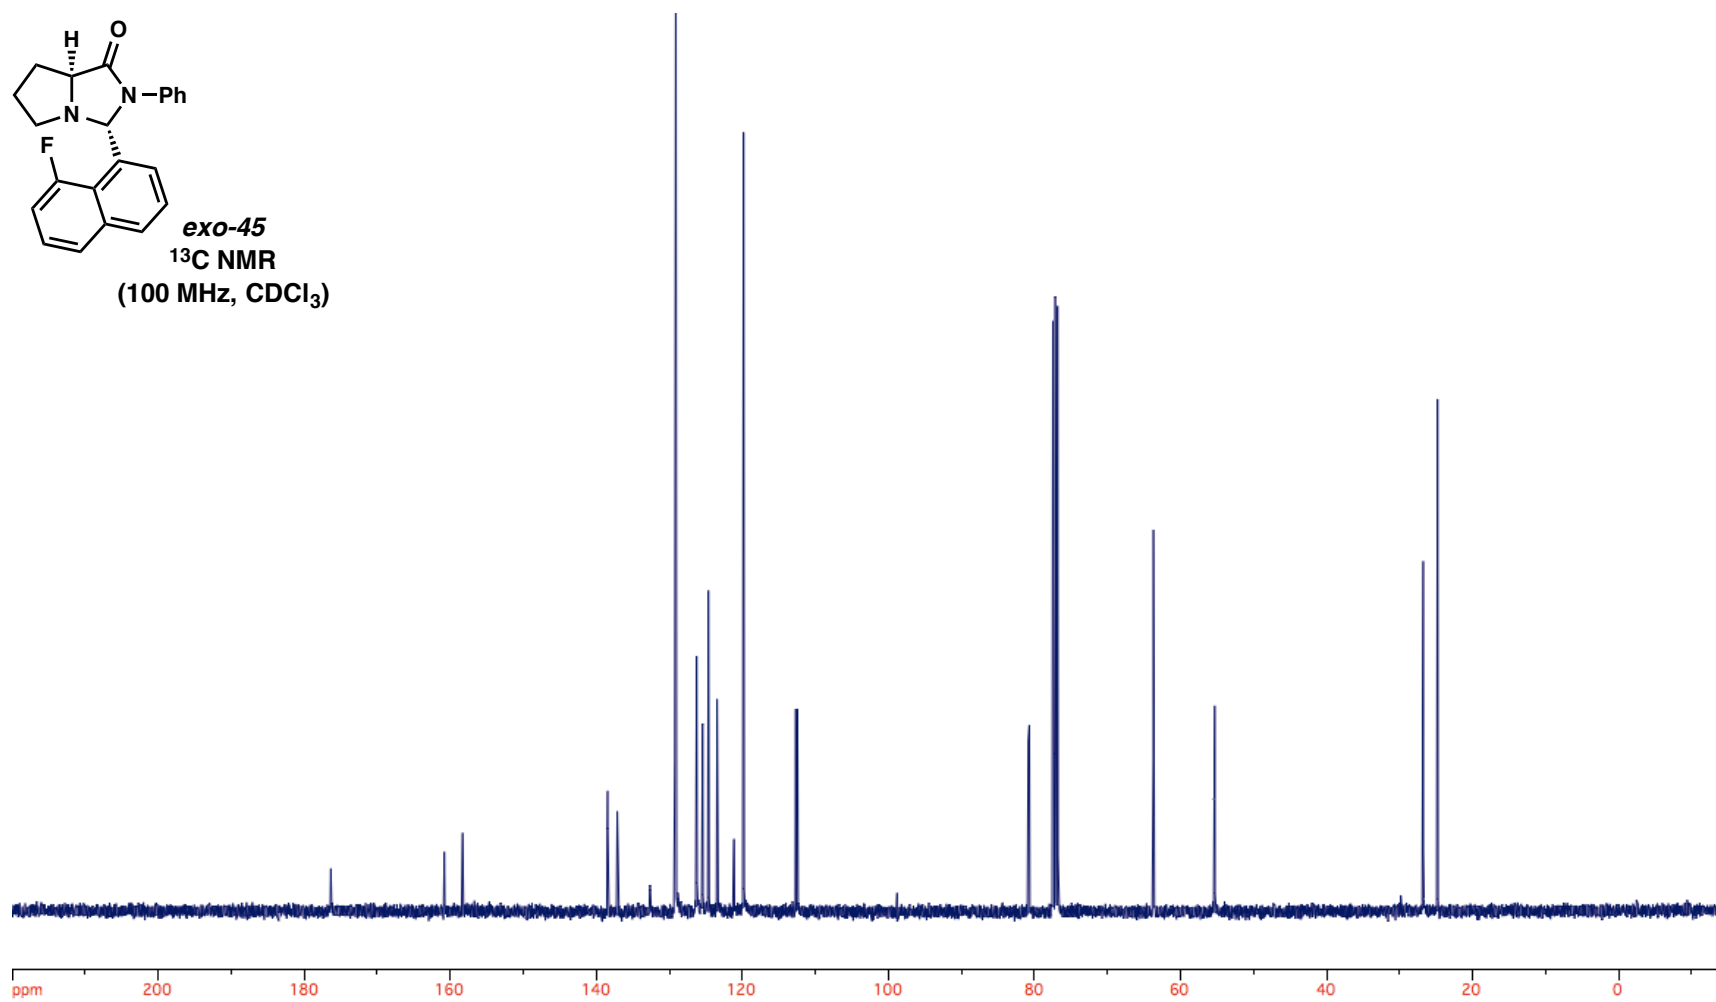



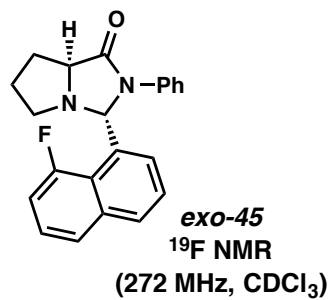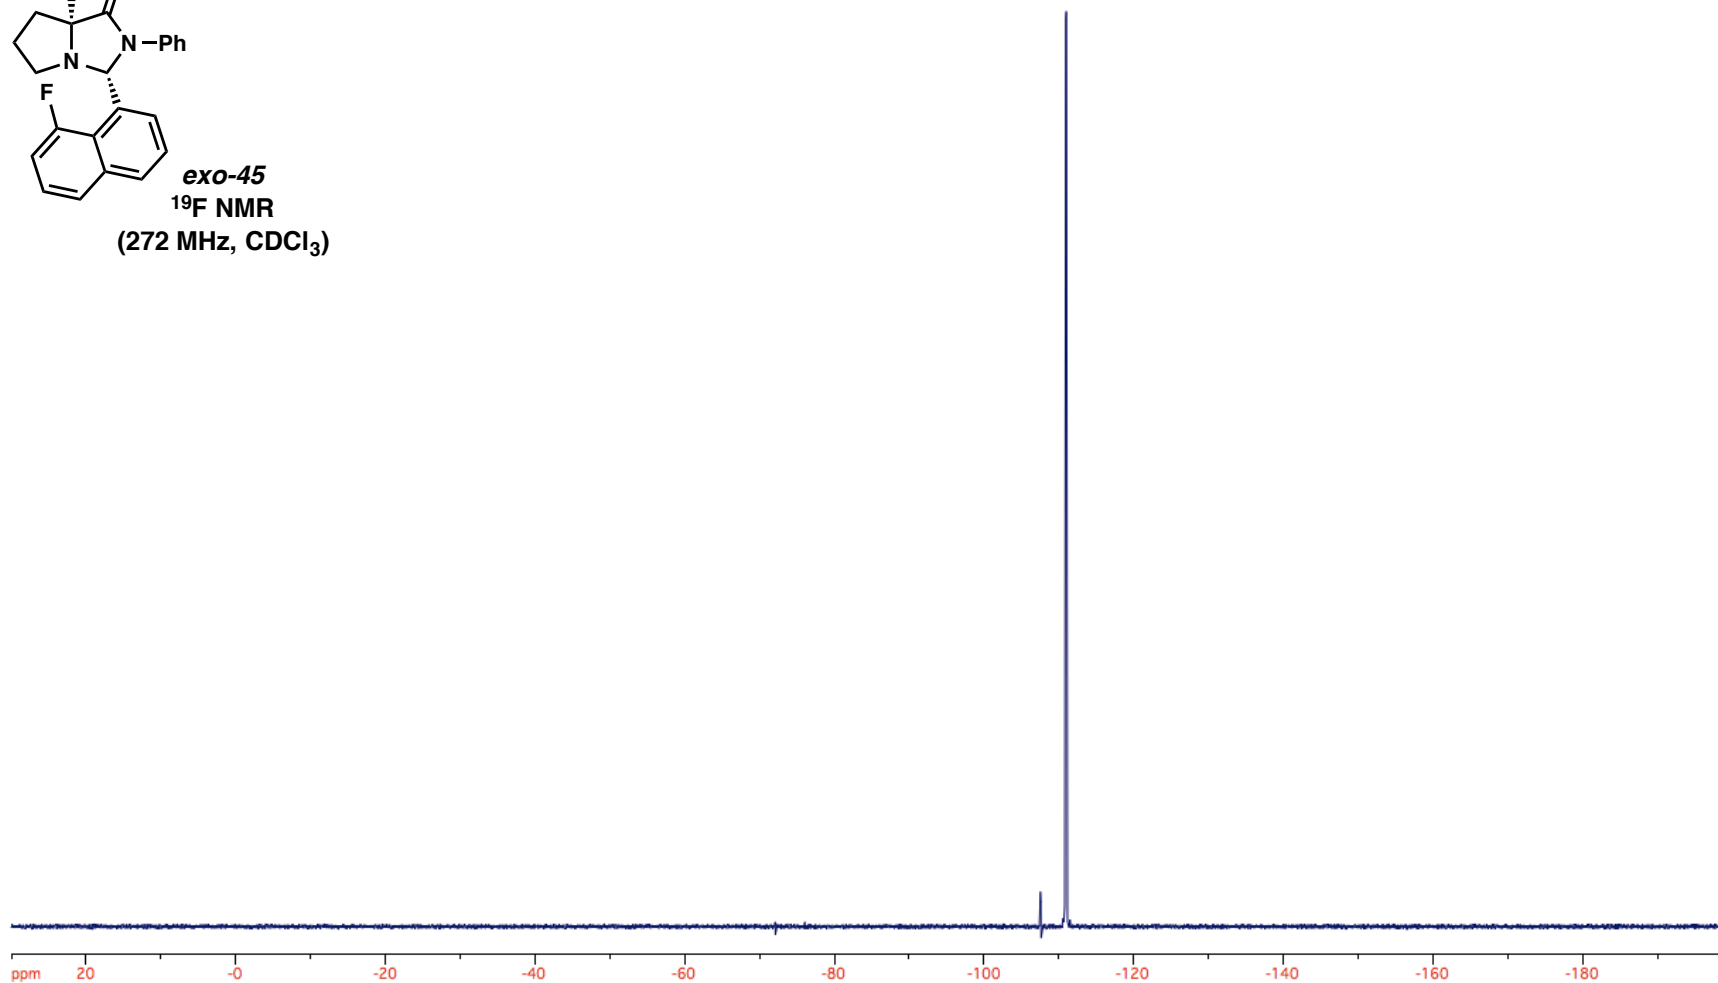

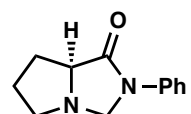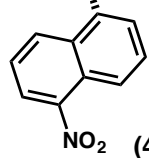

**exo-46**  
**<sup>1</sup>H NMR**  
**(400 MHz, CDCl<sub>3</sub>)**  
**15:1 exo/endo**

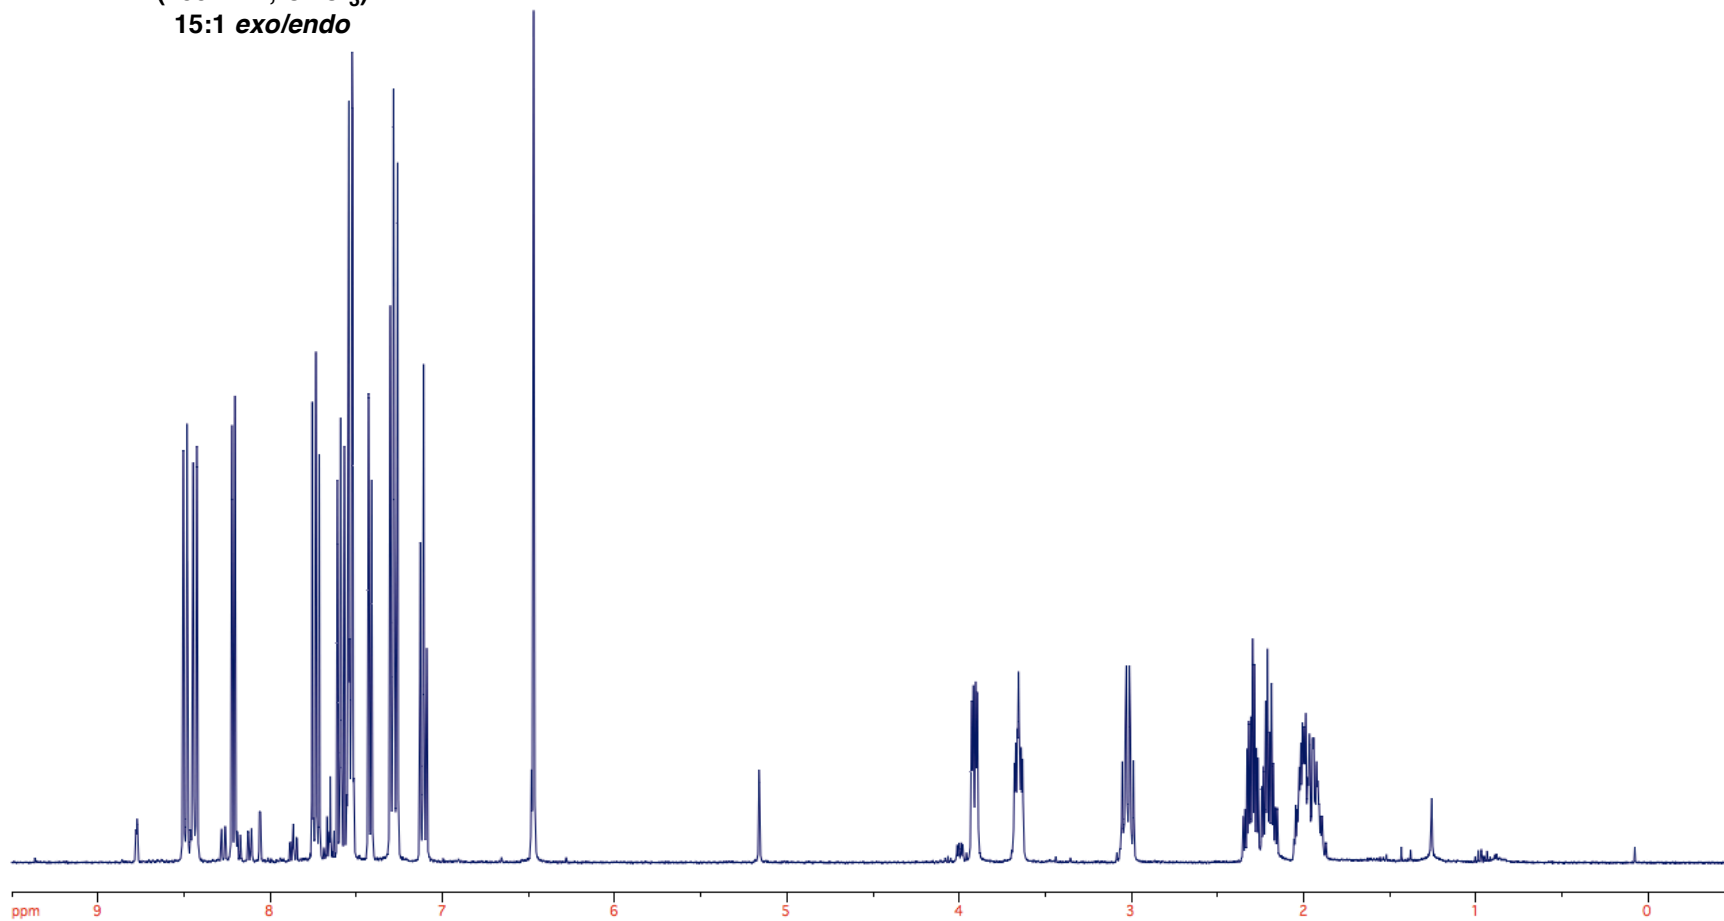

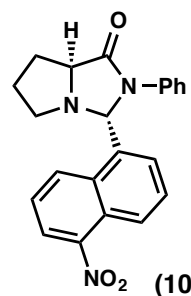

***exo*-46**  
**<sup>13</sup>C NMR**  
**(100 MHz, CDCl<sub>3</sub>)**  
**15:1 *exo/endo***

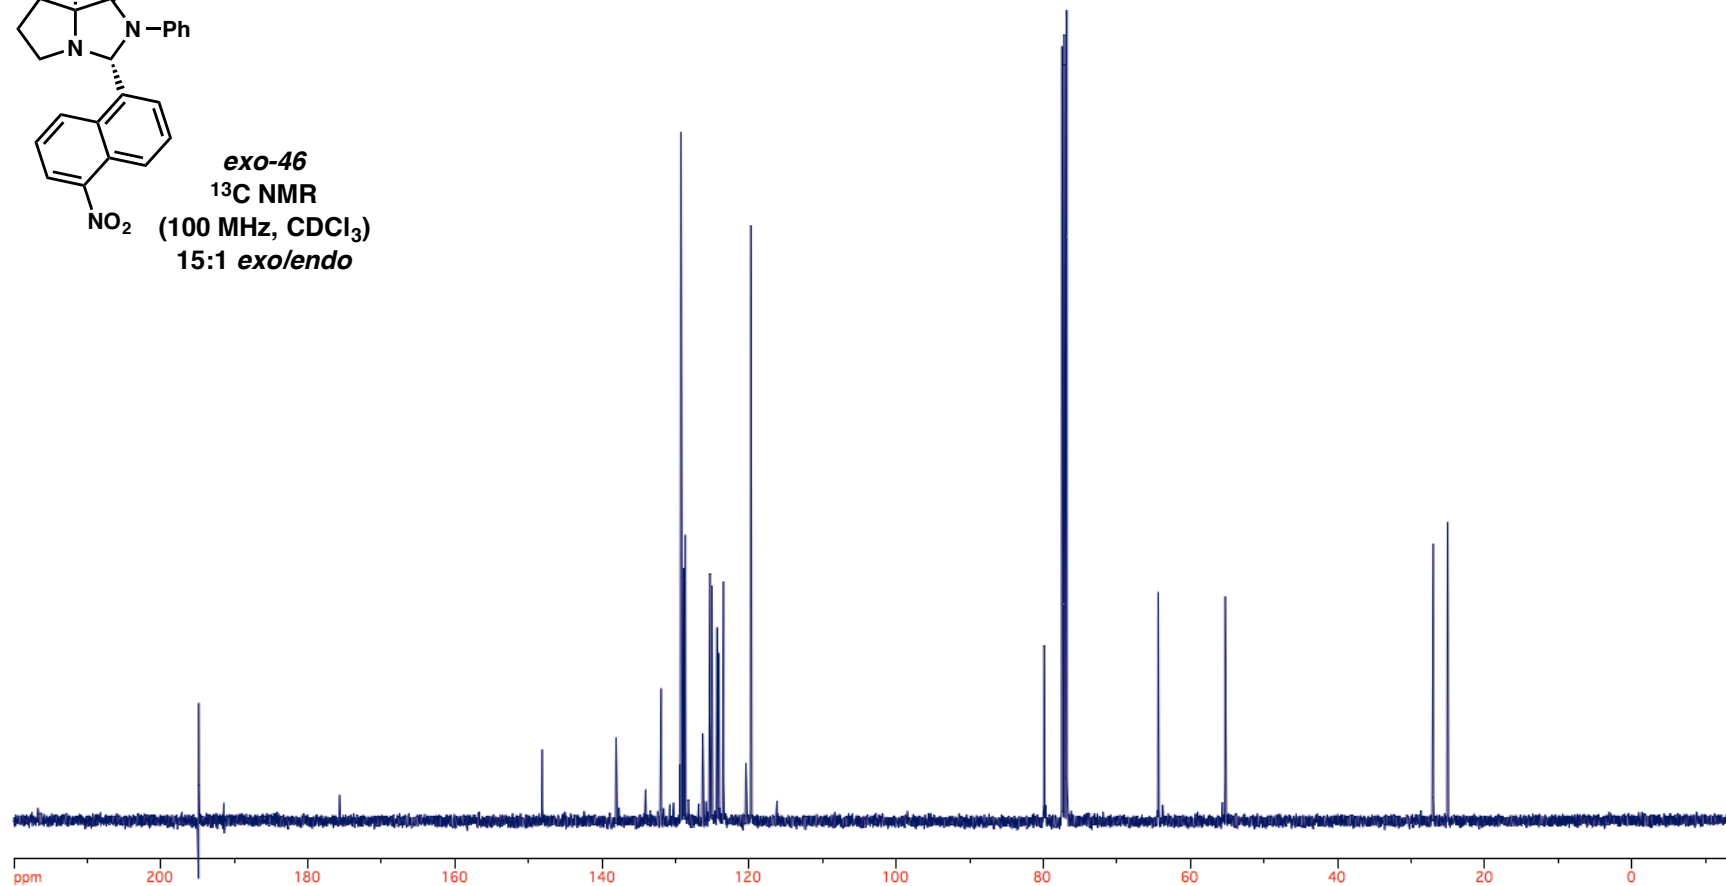

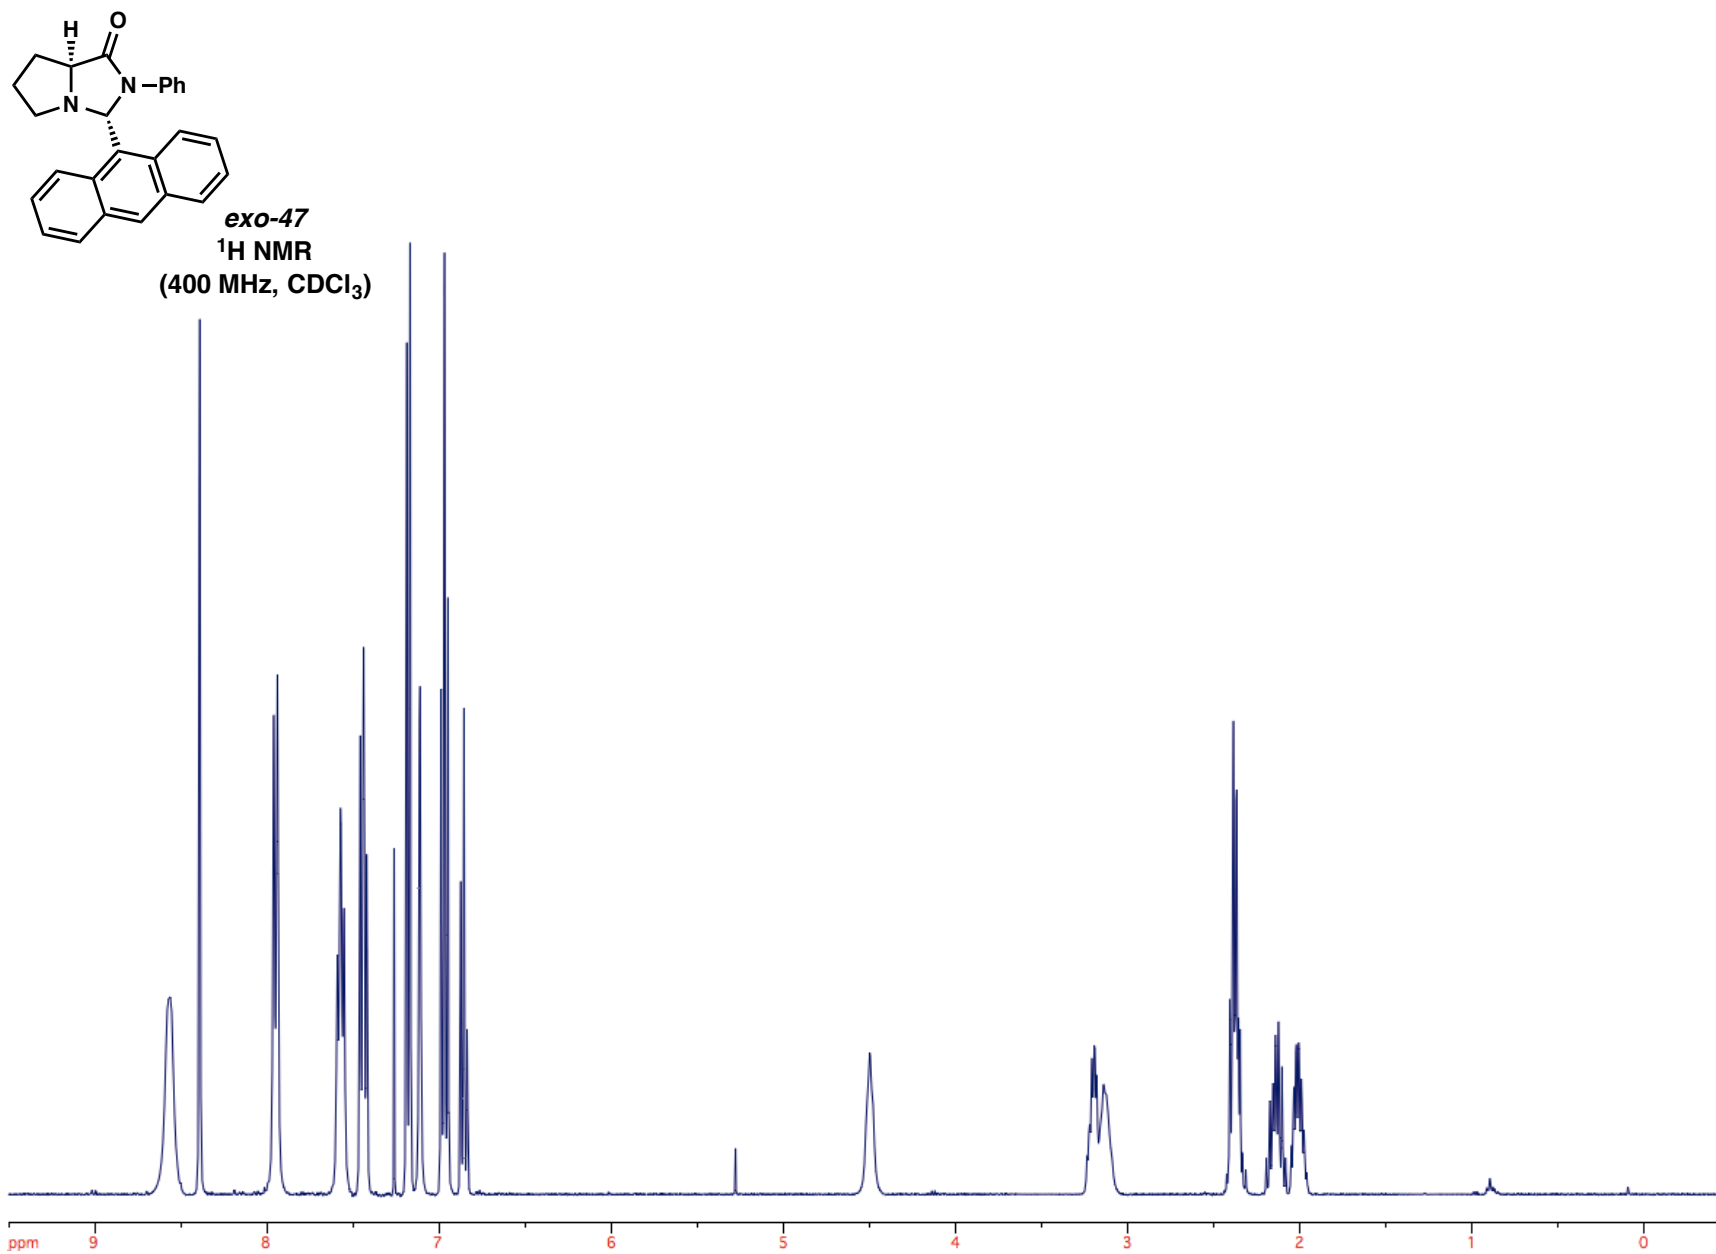

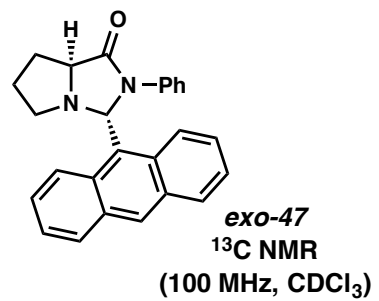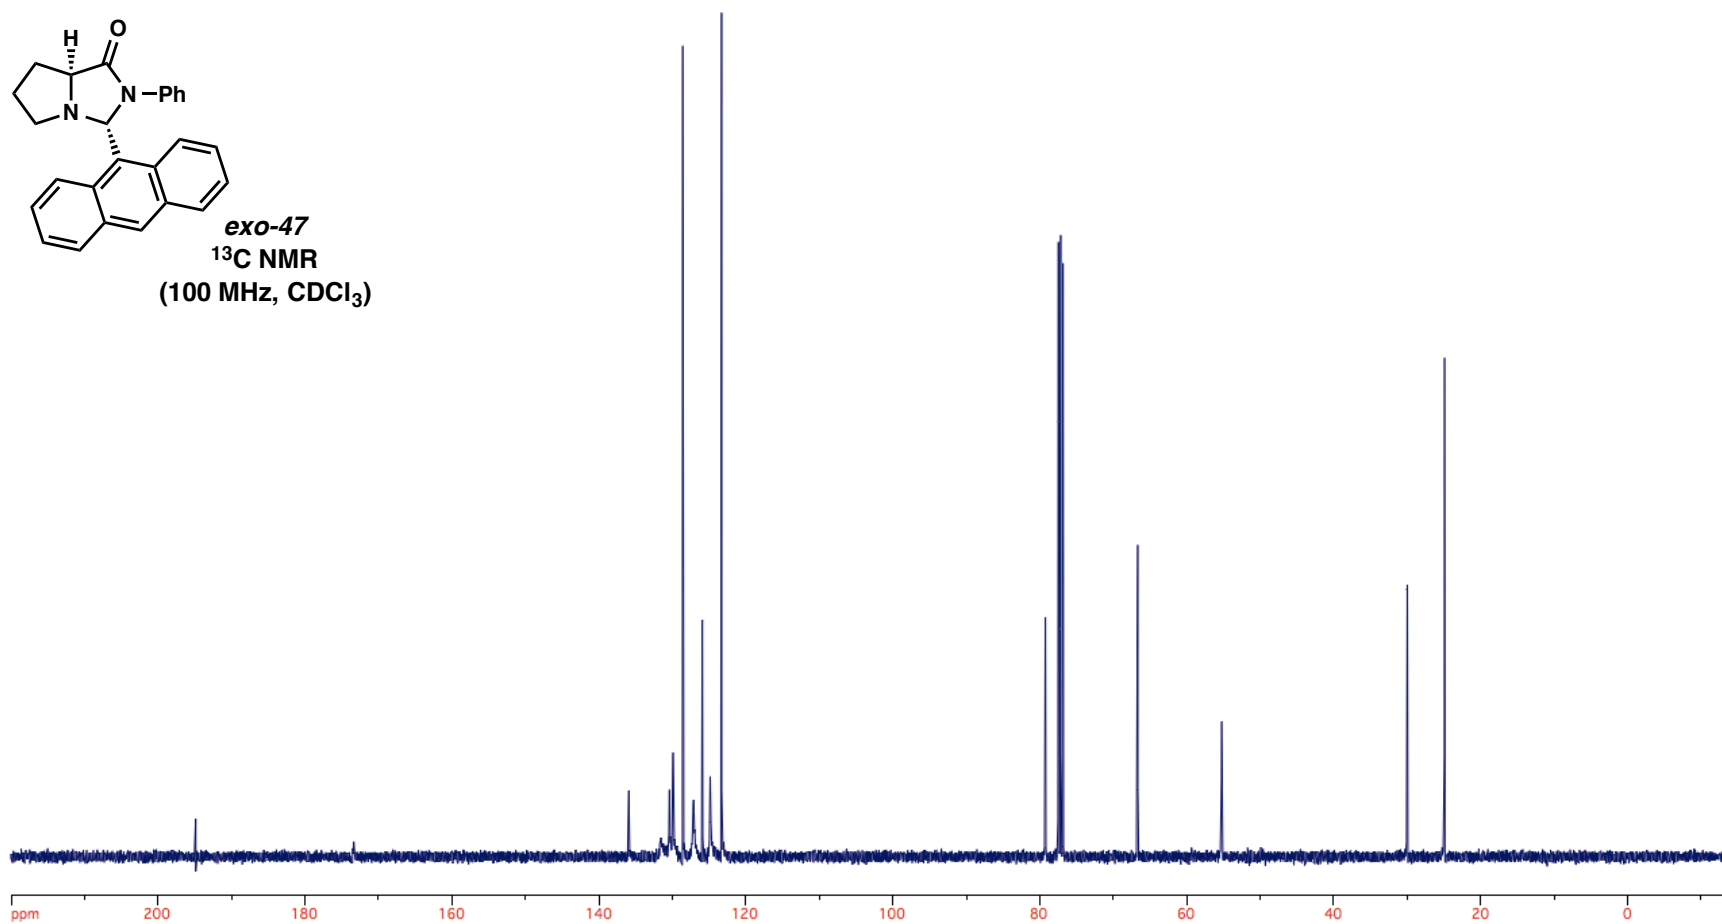

Supplement: NIHMS969342-supplement-SI_File.pdf [file NIHMS969342-supplement-SI_File.pdf]
